# Supplementary material for: Examining trends in inequality in the use of reproductive health care services in Ghana and Nigeria
Source: PubMed Central journal article supplement (PMC6293518; doi:10.1186/s12884-018-2102-9), 2018-12-13

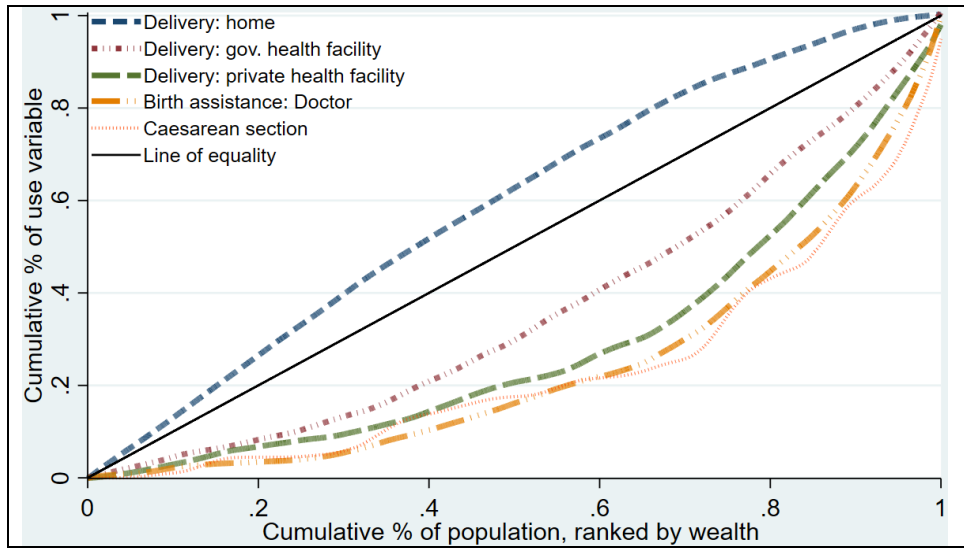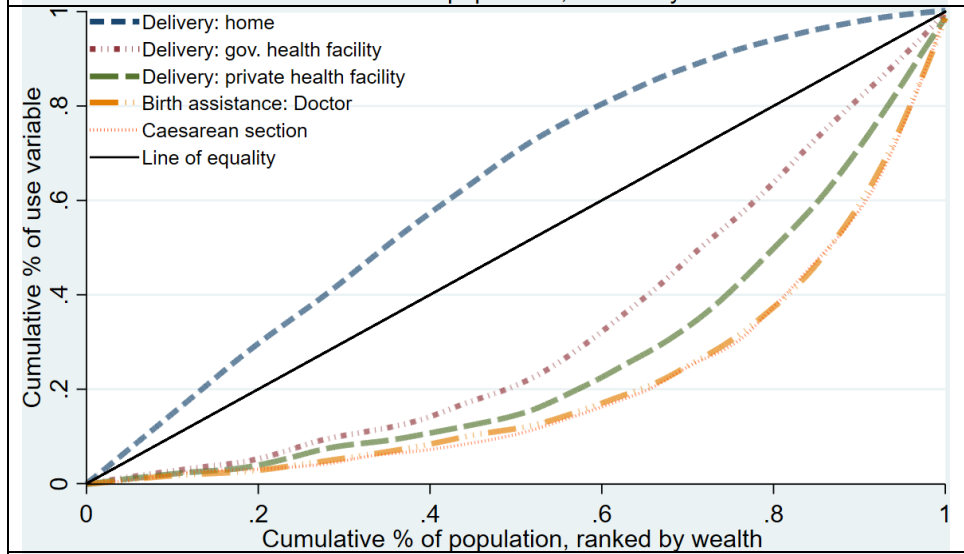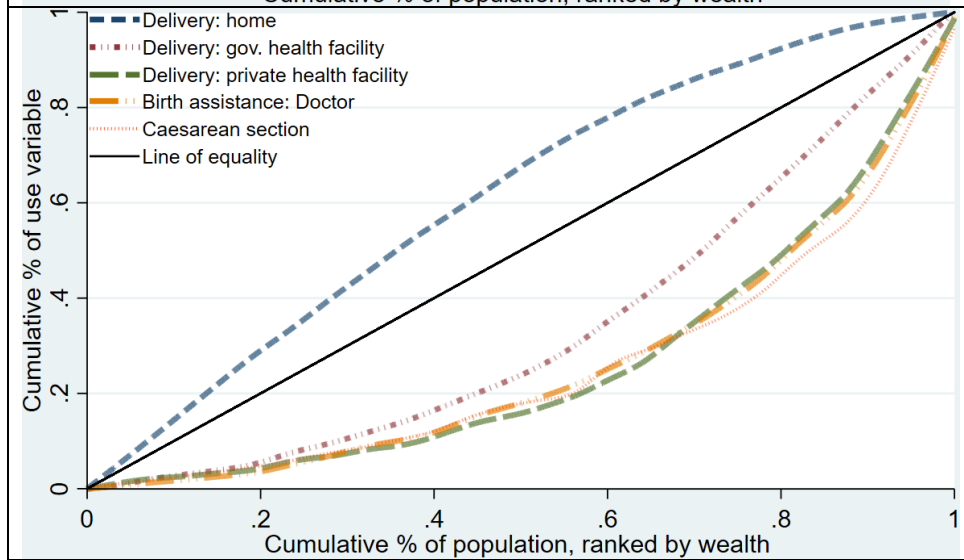

Supplement: 12884_2018_2102_MOESM7_ESM.pdf [file 12884_2018_2102_MOESM7_ESM.pdf]
