# Supplementary material for: Examining trends in inequality in the use of reproductive health care services in Ghana and Nigeria
Source: Springer Nature journal article supplement (doi:10.1186/s12884-018-2102-9), 2018-12-01
Supplement: MOESM1 [file 16340550]

Title of data: A1 - Definition of indicators used in the analysis, Ghana  
 Description of data: Grouping description of outcome variable

| Outcome                                                        | GH 2003                                     | GH 2008                                                               | GH 2014                                        |
|----------------------------------------------------------------|---------------------------------------------|-----------------------------------------------------------------------|------------------------------------------------|
| <b><u>Family planning</u></b>                                  |                                             |                                                                       |                                                |
| Family planning info: Health facility                          | At health facility, told of family planning | At health facility, told of family planning                           | At health facility, told of family planning    |
| Family planning worker visit                                   | Visited by FP worker last 12m               | Visited by FP worker last 12m                                         | Visited by FP worker last 12m                  |
| Family planning: TV                                            | Heard FP on TV last months                  | Heard FP on TV last months                                            | Heard FP on TV last months                     |
| Family planning: Print                                         | Heard FP newspaper last months              | Heard FP newspaper last months                                        | Heard FP newspaper last months                 |
| Modern contraceptive                                           | Current use by method type                  | Current use by method type                                            | Current use by method type                     |
| Information on pregnancy complication                          | Told about pregnancy complications          | Told about pregnancy complications                                    | Told about pregnancy complications             |
| Family planning: unmet need                                    | Wanted last child                           | Wanted last child                                                     | Wanted last child                              |
| <b><u>Antenatal care</u></b>                                   |                                             |                                                                       |                                                |
| ANC: nurse assisted                                            | Assistance: nurse/midwife                   | Assistance: nurse/midwife                                             | Assistance: nurse/midwife                      |
| ANC: government health facility                                | Antenatal care: govt. hospital center       | Antenatal care: govt. hospital<br>Antenatal care: govt. health center | Antenatal care: govt. hospital                 |
|                                                                | Antenatal care: govt. health post           |                                                                       | Antenatal care: govt. health center            |
| ANC: Private health facility                                   | Antenatal care: public mobile clinic        | Antenatal care: public mobile clinic                                  | Antenatal care: public mobile clinic           |
|                                                                | Antenatal care: other public                | Antenatal care: other public                                          | Antenatal care: other public                   |
| ANC: 1st trimester                                             | Antenatal care: pvt. hospital/clinic        | Antenatal care: pvt. hospital/clinic                                  | Antenatal care: pvt. hospital/clinic           |
|                                                                | Antenatal care: pvt. mobile clinic          | Antenatal care: pvt. mobile clinic                                    | Antenatal care: FP/PPAG clinic                 |
| ANC: 4+ tetanus injection                                      | Antenatal care: Maternity home              | Antenatal care: Maternity home                                        | Antenatal care: mobile clinic                  |
|                                                                | Antenatal care: other private               | Antenatal care: other private                                         | Antenatal care: other private                  |
| ANC: Home                                                      | Timing of 1st antenatal check               | Timing of 1st antenatal check                                         | Timing of 1st antenatal check                  |
| ANC: Home                                                      | Tetanus injections bef. birth               | Tetanus injections bef. birth                                         | Tetanus injections bef. birth                  |
|                                                                | Antenatal care: your home                   | Antenatal care: respondent's home                                     | Antenatal care: respondent's home              |
| Health worker's assistance during pregnancy outside a facility | Antenatal care: other home                  | Antenatal care: other home                                            | Antenatal care: other home                     |
|                                                                | Antenatal care: TBA's home                  | Antenatal care: other                                                 | Antenatal care: other                          |
| Health worker's assistance during pregnancy outside a facility | Assistance: auxiliary midwife               | Assistance: auxiliary midwife                                         | Assistance: auxiliary midwife                  |
|                                                                | Assistance: trad.birth attend.              | Assistance: community health officer/nurse                            | Assistance: community/village health volunteer |
| Health worker's assistance during pregnancy outside a facility | Assistance: relative, friend                | Assistance: traditional birth attendant (trained)                     | Assistance: traditional practitioner           |
|                                                                | Assistance: no one                          | Assistance: community/village health volunteer                        | Assistance: other                              |
| Health worker's assistance during pregnancy outside a facility | Assistance: other resp (uncod)              | Assistance: traditional practitioner                                  | Assistance: no one                             |
|                                                                |                                             | Assistance: other                                                     |                                                |
|                                                                |                                             | Assistance: no one                                                    |                                                |
| <b><u>Delivery care</u></b>                                    |                                             |                                                                       |                                                |
| Delivery: home                                                 | Place of delivery: Respondents home         | Place of delivery: Respondents home                                   | Place of delivery: Respondents home            |
| Delivery: government health facility                           | Other home                                  | Other home                                                            | Other home                                     |
|                                                                | TBA's home                                  | TBA's home                                                            | TBA's home                                     |
| Delivery: private health facility                              | Place of delivery: Govt. hospital           | Place of delivery: Govt. hospital                                     | Place of delivery: Govt. hospital              |
|                                                                | Govt. health center                         | Govt. health center                                                   | Govt. health center                            |
| Delivery: private health facility                              | Govt. health post                           | Govt. health post                                                     | Govt. health post                              |
|                                                                | Place of delivery: Private hosp/clinic      | Place of delivery: Private hosp/clinic                                | Place of delivery: Private hosp/clinic         |
| Birth assistance: Doctor                                       | Maternity home                              | Maternity home                                                        | Maternity home                                 |
|                                                                | OTHER                                       | OTHER                                                                 | OTHER                                          |
| Birth assistance: Doctor                                       | Assistance: doctor                          | Assistance: doctor                                                    | Assistance: doctor                             |

Title of data: A2 - Definition of indicators used in the analysis, Nigeria  
Description of data: Grouping description of outcome variable

| Outcome                                                        | NG 2003                                                                                                                                                                            | NG 2008                                                                                                                                                  | NG 2013                                                                                                                                                                                           |
|----------------------------------------------------------------|------------------------------------------------------------------------------------------------------------------------------------------------------------------------------------|----------------------------------------------------------------------------------------------------------------------------------------------------------|---------------------------------------------------------------------------------------------------------------------------------------------------------------------------------------------------|
| <b>Family planning</b>                                         |                                                                                                                                                                                    |                                                                                                                                                          |                                                                                                                                                                                                   |
| Family planning info: Health facility                          | At health facility, told of family planning                                                                                                                                        | At health facility, told of family planning                                                                                                              | At health facility, told of family planning                                                                                                                                                       |
| Family planning worker visit                                   | Visited by FP worker last 12m                                                                                                                                                      | Visited by FP worker last 12m                                                                                                                            | Visited by FP worker last 12m                                                                                                                                                                     |
| Family planning: TV                                            | Heard FP on TV last months                                                                                                                                                         | Heard FP on TV last months                                                                                                                               | Heard FP on TV last months                                                                                                                                                                        |
| Family planning: Print                                         | Heard FP newspaper last months                                                                                                                                                     | Heard FP newspaper last months                                                                                                                           | Heard FP newspaper last months                                                                                                                                                                    |
| Modern contraceptive                                           | Current use by method type                                                                                                                                                         | Current use by method type                                                                                                                               | Current use by method type                                                                                                                                                                        |
| Information on pregnancy complication                          | Told about pregnancy complications                                                                                                                                                 | Told about pregnancy complications                                                                                                                       | Told about pregnancy complications                                                                                                                                                                |
| Family planning: unmet need                                    | Wanted last child                                                                                                                                                                  | Wanted last child                                                                                                                                        | Wanted last child                                                                                                                                                                                 |
| <b>Antenatal care</b>                                          |                                                                                                                                                                                    |                                                                                                                                                          |                                                                                                                                                                                                   |
| ANC: nurse assisted                                            | Assistance: nurse/midwife                                                                                                                                                          | Assistance: nurse/midwife                                                                                                                                | Assistance: nurse/midwife                                                                                                                                                                         |
| ANC: government health facility                                | Antenatal care: govt. hospital<br>Antenatal care: govt. health center<br>Antenatal care: govt. health post<br>Antenatal care: public mobile clinic<br>Antenatal care: other public | Antenatal care: govt. hospital<br>Antenatal care: govt. health center<br>Antenatal care: govt. health post/dispensary<br>Antenatal care: other public    | Antenatal care: government hospital<br>Antenatal care: government health center<br>Antenatal care: government health post/dispensary<br>Antenatal care: other public sector                       |
| ANC: Private health facility                                   | Antenatal care: pvt. hospital/clinic<br>Antenatal care: other private                                                                                                              | Antenatal care: pvt. hospital/clinic<br>Antenatal care: other private                                                                                    | Antenatal care: private hospital/clinic<br>Antenatal care: other private medical sector                                                                                                           |
| ANC: 1st trimester                                             | Timing of 1st antenatal check                                                                                                                                                      | Timing of 1st antenatal check                                                                                                                            | Timing of 1st antenatal check                                                                                                                                                                     |
| ANC: 4+ tetanus injection                                      | Tetanus injections bef. birth                                                                                                                                                      | Tetanus injections bef. birth                                                                                                                            | Tetanus injections bef. birth                                                                                                                                                                     |
| ANC: Home                                                      | Antenatal care: your home<br>Antenatal care: other home<br>Antenatal care: other                                                                                                   | Antenatal care: your home<br>Antenatal care: other home<br>Antenatal care: other                                                                         | Antenatal care: respondent's home<br>Antenatal care: other home<br>Antenatal care: other                                                                                                          |
| Health worker's assistance during pregnancy outside a facility | Assistance: auxiliary midwife<br>Assistance: trad.birth attend.<br>Assistance: relative, friend<br>Assistance: other resp (uncod)<br>Assistance: no one                            | Assistance: auxiliary midwife<br>Assistance: trad.birth attend.<br>Assistance: relative, friend<br>Assistance: other resp (uncod)<br>Assistance: no one. | Assistance: auxiliary midwife<br>Assistance: community extension health worker<br>Assistance: traditional birth attendant<br>Assistance: relative/ friend<br>Assistance: other Assistance: no one |
| <b>Delivery care</b>                                           |                                                                                                                                                                                    |                                                                                                                                                          |                                                                                                                                                                                                   |
| Delivery: home                                                 | Place of delivery: Respondents home<br>Other home<br>TBA's home                                                                                                                    | Place of delivery: Respondents home<br>Other home<br>TBA's home                                                                                          | Place of delivery: Respondents home<br>Other home<br>TBA's home                                                                                                                                   |
| Delivery: government health facility                           | Place of delivery: Govt. hospital<br>Govt. health center<br>Govt. health post                                                                                                      | Place of delivery: Govt. hospital<br>Govt. health center<br>Govt. health post                                                                            | Place of delivery: Govt. hospital<br>Govt. health center<br>Govt. health post                                                                                                                     |
| Delivery: private health facility                              | Place of delivery: Private hosp/clinic<br>Maternity home<br>OTHER                                                                                                                  | Place of delivery: Private hosp/clinic<br>Maternity home<br>OTHER                                                                                        | Place of delivery: Private hosp/clinic<br>Maternity home<br>OTHER                                                                                                                                 |
| Birth assistance: Doctor                                       | Assistance: doctor                                                                                                                                                                 | Assistance: doctor                                                                                                                                       | Assistance: doctor                                                                                                                                                                                |

Title of data: A3 - Definition of independent variables used in the analysis  
 Description of data: Coding of the dependent and control variables

| <b>Independent variable</b> | <b>Questions asked</b>                                             | <b>Coding</b> |
|-----------------------------|--------------------------------------------------------------------|---------------|
| <b>Age group</b>            | <b>Age 5-year groups</b>                                           | Categorical   |
| 15-24                       | 15-19<br>20-24<br>25-29<br>30-34<br>35-39<br>40-44                 |               |
| 25-49                       | 45-49                                                              |               |
| <b>Marital status</b>       | <b>Current marital status</b>                                      | Categorical   |
| never                       | Never married<br>Married<br>Living together<br>Widowed<br>Divorced |               |
| now / then                  | Not living together                                                |               |
| <b>Maternal occupation</b>  | <b>Respondent's occupation</b>                                     | Categorical   |
| not working                 | Not working<br>Professional/technical/managerial<br>Clerical       |               |
| Professional / sales        | Sales<br>Agricultural - self employed                              |               |
| Agriculture                 | Agricultural - employee<br>Household and domestic<br>Services      |               |
| Others                      | Skilled manual<br>Unskilled manual                                 |               |
| <b>Location</b>             | <b>Type of place of residence</b>                                  | Categorical   |
| urban                       |                                                                    |               |
| rural                       |                                                                    |               |
| Region (Ghana)              | Region                                                             | Categorical   |
| Region (Nigeria)            | Region                                                             | Categorical   |

Title of data: A4 - Socio-demographic characteristics: Ghana (years 2000, 2005 & 2014) and Nigeria (years 2003, 2008 & 2013)  
 Description of data: Distribution of the independent variables

| Maternal characteristic | GHANA       |             |             | NIGERIA     |              |              |
|-------------------------|-------------|-------------|-------------|-------------|--------------|--------------|
|                         | 2003        | 2008        | 2014        | 2003        | 2008         | 2013         |
| Age group               |             |             |             |             |              |              |
| 15-24                   | 649 (23.4)  | 518 (24.1)  | 923 (21.5)  | 1090 (28.9) | 4779 (26.5)  | 5180 (25.7)  |
| 25-49                   | 2128 (76.6) | 1629 (75.9) | 3371 (78.5) | 2685 (71.1) | 13249 (73.5) | 15012 (74.3) |
| Marital status          |             |             |             |             |              |              |
| Never                   | 87 (3.1)    | 117 (5.4)   | 363 (8.5)   | 103 (2.7)   | 455 (2.5)    | 538 (2.7)    |
| Now / then              | 2690 (96.9) | 2030 (94.6) | 3931 (91.5) | 3672 (97.3) | 17572 (97.5) | 19654 (97.3) |
| Maternal occupation     |             |             |             |             |              |              |
| Not working             | 292 (10.6)  | 219 (10.3)  | 759 (17.7)  | 1286 (34.1) | 5704 (31.8)  | 5877 (29.3)  |
| Professional / Sales    | 689 (25.0)  | 753 (35.3)  | 1603 (37.4) | 1556 (41.2) | 6314 (35.2)  | 8498 (42.3)  |
| Agriculture             | 1260 (45.7) | 812 (38.0)  | 1316 (30.7) | 584 (15.5)  | 3508 (19.6)  | 2458 (12.2)  |
| Others                  | 519 (18.8)  | 351 (16.4)  | 608 (14.2)  | 349 (9.2)   | 2404 (13.4)  | 3240 (16.1)  |
| Location                |             |             |             |             |              |              |
| Urban                   | 817 (29.4)  | 763 (35.5)  | 1778 (41.4) | 1350 (35.8) | 4825 (26.8)  | 6790 (33.6)  |
| Rural                   | 1960 (70.6) | 1384 (64.5) | 2516 (58.6) | 2425 (64.2) | 13203 (73.2) | 13402 (66.4) |
| Region (Ghana)          |             |             |             |             |              |              |
| Western                 | 237 (8.5)   | 189 (8.8)   | 431 (10.0)  | -           | -            | -            |
| Central                 | 168 (6.0)   | 158 (7.4)   | 436 (10.2)  | -           | -            | -            |
| Greater Accra           | 264 (9.5)   | 210 (9.8)   | 354 (8.2)   | -           | -            | -            |
| Volta                   | 202 (7.3)   | 181 (8.4)   | 346 (8.1)   | -           | -            | -            |
| Eastern                 | 228 (8.2)   | 187 (8.7)   | 397 (9.2)   | -           | -            | -            |
| Ashanti                 | 423 (15.2)  | 318 (14.8)  | 420 (9.8)   | -           | -            | -            |
| Brong Ahafo             | 337 (12.1)  | 207 (9.6)   | 490 (11.4)  | -           | -            | -            |
| Northern                | 429 (15.4)  | 306 (14.3)  | 622 (14.5)  | -           | -            | -            |
| Upper West              | 265 (9.5)   | 181 (8.4)   | 434 (10.1)  | -           | -            | -            |
| Upper East              | 224 (8.1)   | 210 (9.8)   | 364 (8.5)   | -           | -            | -            |
| Region (Nigeria)        |             |             |             |             |              |              |
| North Central           | -           | -           | -           | 645 (17.1)  | 3350 (18.6)  | 3095 (15.3)  |
| North East              | -           | -           | -           | 867 (23.0)  | 3972 (22.0)  | 4001 (19.8)  |
| North West              | -           | -           | -           | 1125 (29.8) | 4888 (27.1)  | 6206 (30.7)  |
| South East              | -           | -           | -           | 329 (8.7)   | 1454 (8.1)   | 1724 (8.5)   |
| South South             | -           | -           | -           | 380 (10.1)  | 2101 (11.7)  | 2500 (12.4)  |
| South West              | -           | -           | -           | 429 (11.4)  | 2263 (12.6)  | 2666 (13.2)  |
| Total                   | 2777        | 2147        | 4294        | 3775        | 18028        | 20192        |

Title of data: B - Supplementary data: Distribution of outcome variables (poorest 20%, richest 20% and total number of women)

Description of data: Distribution of the control variables

| Ghana                                    | 2003    |     |         |     |           |      | 2008    |       |         |       |           |         | 2014  |         |       |           |
|------------------------------------------|---------|-----|---------|-----|-----------|------|---------|-------|---------|-------|-----------|---------|-------|---------|-------|-----------|
|                                          | Poorest | %   | Richest | %   | All women |      | Poorest | %     | Richest | %     | All women | Poorest | %     | Richest | %     | All women |
| Family planning info:<br>Health facility | No      | 141 | 18.98   | 178 | 23.96     | 743  | 115     | 15.13 | 190     | 25    | 760       | 312     | 22.29 | 246     | 17.57 | 1400      |
|                                          | Yes     | 147 | 18.8    | 183 | 23.4      | 782  | 116     | 20.03 | 123     | 21.24 | 579       | 354     | 24.2  | 220     | 15.04 | 1463      |
|                                          | Total   | 288 | 18.89   | 361 | 23.67     | 1525 | 231     | 17.25 | 313     | 23.38 | 1339      | 666     | 23.26 | 466     | 16.28 | 2863      |
| Family planning worker<br>visit          | No      | 492 | 20.95   | 482 | 20.52     | 2349 | 350     | 19.73 | 363     | 20.46 | 1774      | 854     | 23.47 | 586     | 16.1  | 3639      |
|                                          | Yes     | 80  | 20.36   | 63  | 16.03     | 393  | 73      | 20.8  | 68      | 19.37 | 351       | 174     | 26.56 | 76      | 11.6  | 655       |
|                                          | Total   | 572 | 20.86   | 545 | 19.88     | 2742 | 423     | 19.91 | 431     | 20.28 | 2125      | 1028    | 23.94 | 662     | 15.42 | 4294      |
| FP Info: TV                              | No      | 507 | 29.02   | 98  | 5.61      | 1747 | 401     | 28.64 | 90      | 6.43  | 1400      | 889     | 35.24 | 141     | 5.59  | 2523      |
|                                          | Yes     | 67  | 6.71    | 447 | 44.79     | 998  | 23      | 3.17  | 341     | 46.97 | 726       | 139     | 7.85  | 521     | 29.42 | 1771      |
|                                          | Total   | 574 | 20.91   | 545 | 19.85     | 2745 | 424     | 19.94 | 431     | 20.27 | 2126      | 1028    | 23.94 | 662     | 15.42 | 4294      |
| FP Info: Print                           | No      | 567 | 23.29   | 350 | 14.38     | 2434 | 420     | 21.19 | 350     | 17.66 | 1982      | 1018    | 24.7  | 581     | 14.1  | 4121      |
|                                          | Yes     | 6   | 1.95    | 195 | 63.31     | 308  | 4       | 2.78  | 81      | 56.25 | 144       | 10      | 5.78  | 81      | 46.82 | 173       |
|                                          | Total   | 573 | 20.9    | 545 | 19.88     | 2742 | 424     | 19.94 | 431     | 20.27 | 2126      | 1028    | 23.94 | 662     | 15.42 | 4294      |
| Modern contraceptive                     | No      | 23  | 13.07   | 52  | 29.55     | 176  | 5       | 4.2   | 43      | 36.13 | 119       | 22      | 15.17 | 50      | 34.48 | 145       |
|                                          | Yes     | 66  | 12.87   | 158 | 30.8      | 513  | 58      | 15.59 | 98      | 26.34 | 372       | 220     | 19.98 | 152     | 13.81 | 1101      |
|                                          | Total   | 89  | 12.92   | 210 | 30.48     | 689  | 63      | 12.83 | 141     | 28.72 | 491       | 242     | 19.42 | 202     | 16.21 | 1246      |
| Information on pregnancy<br>complication | No      | 251 | 24.25   | 152 | 14.69     | 1035 | 177     | 27.87 | 93      | 14.65 | 635       | 181     | 24.97 | 72      | 9.93  | 725       |
|                                          | Yes     | 239 | 16.07   | 385 | 25.89     | 1487 | 213     | 15.24 | 331     | 23.68 | 1398      | 791     | 23.11 | 585     | 17.09 | 3423      |
|                                          | Total   | 490 | 19.43   | 537 | 21.29     | 2522 | 390     | 19.18 | 424     | 20.86 | 2033      | 972     | 23.43 | 657     | 15.84 | 4148      |

| Ghana                                                          | 2003    |     |         |     |           |      | 2008    |       |         |       |           |         | 2014  |         |       |           |
|----------------------------------------------------------------|---------|-----|---------|-----|-----------|------|---------|-------|---------|-------|-----------|---------|-------|---------|-------|-----------|
|                                                                | Poorest | %   | Richest | %   | All women |      | Poorest | %     | Richest | %     | All women | Poorest | %     | Richest | %     | All women |
| Family planning: unmet need                                    | No      | 374 | 22.89   | 337 | 20.62     | 1634 | 290     | 21.9  | 287     | 21.68 | 1324      | 769     | 25.43 | 500     | 16.53 | 3024      |
|                                                                | Yes     | 197 | 17.91   | 207 | 18.82     | 1100 | 133     | 16.58 | 144     | 17.96 | 802       | 259     | 20.39 | 162     | 12.76 | 1270      |
|                                                                | Total   | 571 | 20.89   | 544 | 19.9      | 2734 | 423     | 19.9  | 431     | 20.27 | 2126      | 1028    | 23.94 | 662     | 15.42 | 4294      |
| Health worker's assistance during pregnancy outside a facility | No      | 110 | 9.81    | 445 | 39.7      | 1121 | 232     | 16.84 | 365     | 26.49 | 1378      | 783     | 21.82 | 624     | 17.39 | 3588      |
|                                                                | Yes     | 461 | 28.6    | 99  | 6.14      | 1612 | 190     | 25.47 | 66      | 8.85  | 746       | 245     | 34.7  | 38      | 5.38  | 706       |
|                                                                | Total   | 571 | 20.89   | 544 | 19.9      | 2733 | 422     | 19.87 | 431     | 20.29 | 2124      | 1028    | 23.94 | 662     | 15.42 | 4294      |
| ANC: nurse assisted                                            | No      | 466 | 28.59   | 125 | 7.67      | 1630 | 338     | 31.35 | 86      | 7.98  | 1078      | 541     | 34.31 | 124     | 7.86  | 1577      |
|                                                                | Yes     | 105 | 9.52    | 419 | 37.99     | 1103 | 84      | 8.03  | 345     | 32.98 | 1046      | 487     | 17.92 | 538     | 19.8  | 2717      |
|                                                                | Total   | 571 | 20.89   | 544 | 19.9      | 2733 | 422     | 19.87 | 431     | 20.29 | 2124      | 1028    | 23.94 | 662     | 15.42 | 4294      |
| ANC: government health facility                                | No      | 45  | 15.46   | 87  | 29.9      | 291  | 19      | 8.37  | 81      | 35.68 | 227       | 34      | 9.42  | 133     | 36.84 | 361       |
|                                                                | Yes     | 446 | 19.96   | 451 | 20.19     | 2234 | 375     | 20.73 | 341     | 18.85 | 1809      | 941     | 24.75 | 526     | 13.83 | 3802      |
|                                                                | Total   | 491 | 19.45   | 538 | 21.31     | 2525 | 394     | 19.35 | 422     | 20.73 | 2036      | 975     | 23.42 | 659     | 15.83 | 4163      |
| ANC: Private health facility                                   | No      | 460 | 20.6    | 431 | 19.3      | 2233 | 382     | 20.6  | 345     | 18.61 | 1854      | 939     | 24.61 | 526     | 13.78 | 3816      |
|                                                                | Yes     | 31  | 10.62   | 107 | 36.64     | 292  | 12      | 6.59  | 77      | 42.31 | 182       | 36      | 10.37 | 133     | 38.33 | 347       |
|                                                                | Total   | 491 | 19.45   | 538 | 21.31     | 2525 | 394     | 19.35 | 422     | 20.73 | 2036      | 975     | 23.42 | 659     | 15.83 | 4163      |
| ANC: 1st trimester                                             | No      | 285 | 22.44   | 203 | 15.98     | 1270 | 208     | 24.21 | 126     | 14.67 | 859       | 381     | 26.53 | 160     | 11.14 | 1436      |
|                                                                | Yes     | 204 | 16.36   | 334 | 26.78     | 1247 | 180     | 15.38 | 294     | 25.13 | 1170      | 593     | 21.76 | 499     | 18.31 | 2725      |
|                                                                | Total   | 489 | 19.43   | 537 | 21.33     | 2517 | 388     | 19.12 | 420     | 20.7  | 2029      | 974     | 23.41 | 659     | 15.84 | 4161      |
| ANC: +4 tetanus injection                                      | No      | 145 | 33.56   | 30  | 6.94      | 432  | 83      | 32.17 | 18      | 6.98  | 258       | 160     | 32.52 | 42      | 8.54  | 492       |

| Ghana                                | 2003    |     |         |     |           |      | 2008    |       |         |       |           |         | 2014  |         |       |           |
|--------------------------------------|---------|-----|---------|-----|-----------|------|---------|-------|---------|-------|-----------|---------|-------|---------|-------|-----------|
|                                      | Poorest | %   | Richest | %   | All women |      | Poorest | %     | Richest | %     | All women | Poorest | %     | Richest | %     | All women |
| ANC: Home                            | Yes     | 421 | 18.67   | 493 | 21.86     | 2255 | 335     | 18.19 | 407     | 22.1  | 1842      | 858     | 22.81 | 616     | 16.37 | 3762      |
|                                      | Total   | 566 | 21.06   | 523 | 19.46     | 2687 | 418     | 19.9  | 425     | 20.24 | 2100      | 1018    | 23.93 | 658     | 15.47 | 4254      |
|                                      | No      | 476 | 19.23   | 537 | 21.7      | 2475 | 384     | 19.26 | 419     | 21.01 | 1994      | 972     | 23.45 | 656     | 15.83 | 4145      |
|                                      | Yes     | 15  | 30      | 1   | 2         | 50   | 10      | 23.81 | 3       | 7.14  | 42        | 3       | 16.67 | 3       | 16.67 | 18        |
|                                      | Total   | 491 | 19.45   | 538 | 21.31     | 2525 | 394     | 19.35 | 422     | 20.73 | 2036      | 975     | 23.42 | 659     | 15.83 | 4163      |
| Home delivery                        | No      | 121 | 10.06   | 466 | 38.74     | 1203 | 108     | 8.88  | 384     | 31.58 | 1216      | 560     | 18.02 | 631     | 20.3  | 3108      |
|                                      | Yes     | 453 | 29.38   | 79  | 5.12      | 1542 | 316     | 34.69 | 47      | 5.16  | 911       | 468     | 39.46 | 31      | 2.61  | 1186      |
|                                      | Total   | 574 | 20.91   | 545 | 19.85     | 2745 | 424     | 19.93 | 431     | 20.26 | 2127      | 1028    | 23.94 | 662     | 15.42 | 4294      |
| Delivery: government health facility | No      | 470 | 26.18   | 184 | 10.25     | 1795 | 325     | 29.73 | 121     | 11.07 | 1093      | 495     | 33.4  | 146     | 9.85  | 1482      |
|                                      | Yes     | 104 | 10.95   | 361 | 38        | 950  | 99      | 9.57  | 310     | 29.98 | 1034      | 533     | 18.95 | 516     | 18.35 | 2812      |
|                                      | Total   | 574 | 20.91   | 545 | 19.85     | 2745 | 424     | 19.93 | 431     | 20.26 | 2127      | 1028    | 23.94 | 662     | 15.42 | 4294      |
| Delivery: private health facility    | No      | 560 | 22.37   | 441 | 17.62     | 2503 | 416     | 21.38 | 357     | 18.35 | 1946      | 1001    | 25.03 | 547     | 13.68 | 3999      |
|                                      | Yes     | 14  | 5.79    | 104 | 42.98     | 242  | 8       | 4.42  | 74      | 40.88 | 181       | 27      | 9.15  | 115     | 38.98 | 295       |
|                                      | Total   | 574 | 20.91   | 545 | 19.85     | 2745 | 424     | 19.93 | 431     | 20.26 | 2127      | 1028    | 23.94 | 662     | 15.42 | 4294      |
| Birth assistance: Doctor             | No      | 556 | 21.77   | 442 | 17.31     | 2554 | 412     | 21.54 | 330     | 17.25 | 1913      | 974     | 25.65 | 482     | 12.69 | 3797      |
|                                      | Yes     | 15  | 8.38    | 102 | 56.98     | 179  | 10      | 4.74  | 101     | 47.87 | 211       | 54      | 10.87 | 180     | 36.22 | 497       |
|                                      | Total   | 571 | 20.89   | 544 | 19.9      | 2733 | 422     | 19.87 | 431     | 20.29 | 2124      | 1028    | 23.94 | 662     | 15.42 | 4294      |
| Caesarean section                    | No      | 561 | 21.32   | 487 | 18.51     | 2631 | 415     | 20.85 | 373     | 18.74 | 1990      | 972     | 25.54 | 503     | 13.22 | 3806      |
|                                      | Yes     | 10  | 10.00   | 56  | 56.00     | 100  | 9       | 6.67  | 57      | 42.22 | 135       | 56      | 11.48 | 159     | 32.58 | 488       |

| Ghana | 2003    |       |         |       |           |  | 2008    |       |         |       |           |         | 2014  |         |       |           |
|-------|---------|-------|---------|-------|-----------|--|---------|-------|---------|-------|-----------|---------|-------|---------|-------|-----------|
|       | Poorest | %     | Richest | %     | All women |  | Poorest | %     | Richest | %     | All women | Poorest | %     | Richest | %     | All women |
| Total | 571     | 20.91 | 543     | 19.88 | 2731      |  | 424     | 19.95 | 430     | 20.24 | 2125      | 1028    | 23.94 | 662     | 15.42 | 4294      |

| Nigeria                                  | 2003    |     |         |     |           |      | 2008    |       |         |       |           |         | 2013  |         |       |           |  |  |
|------------------------------------------|---------|-----|---------|-----|-----------|------|---------|-------|---------|-------|-----------|---------|-------|---------|-------|-----------|--|--|
|                                          | Poorest | %   | Richest | %   | All women |      | Poorest | %     | Richest | %     | All women | Poorest | %     | Richest | %     | All women |  |  |
| Family planning info:<br>Health facility | No      | 153 | 19.64   | 297 | 29.66     | 1135 | 353     | 19.43 | 833     | 43.89 | 2726      | 545     | 19.63 | 707     | 5.224 | 3385      |  |  |
|                                          | Yes     | 51  | 19.64   | 176 | 29.54     | 469  | 108     | 18.25 | 810     | 41.57 | 1798      | 183     | 18.88 | 852     | 8.731 | 2743      |  |  |
|                                          | Total   | 204 | 19.64   | 473 | 29.42     | 1604 | 461     | 17.08 | 1643    | 39.25 | 4524      | 728     | 18.14 | 1559    | 12.24 | 6128      |  |  |
| Family planning worker<br>visit          | No      | 707 | 19.64   | 659 | 29.3      | 3476 | 3489    | 15.9  | 3115    | 36.93 | 16677     | 4802    | 17.39 | 2338    | 15.75 | 17612     |  |  |
|                                          | Yes     | 20  | 19.64   | 84  | 37.84     | 222  | 67      | 6.5   | 444     | 43.11 | 1030      | 150     | 6.06  | 739     | 29.83 | 2477      |  |  |
|                                          | Total   | 727 | 19.64   | 743 | 20.09     | 3698 | 3556    | 20.08 | 3559    | 20.1  | 17707     | 4952    | 24.65 | 3077    | 15.32 | 20089     |  |  |
| FP Info: TV                              | No      | 703 | 19.64   | 370 | 12.29     | 3011 | 3534    | 23.99 | 1689    | 11.47 | 14731     | 4909    | 29.41 | 1570    | 9.41  | 16691     |  |  |
|                                          | Yes     | 23  | 19.64   | 373 | 54.37     | 686  | 39      | 1.28  | 1871    | 61.24 | 3055      | 69      | 1.99  | 1511    | 43.49 | 3474      |  |  |
|                                          | Total   | 726 | 19.64   | 743 | 20.1      | 3697 | 3573    | 20.09 | 3560    | 20.02 | 17786     | 4978    | 24.69 | 3081    | 15.28 | 20165     |  |  |
| FP Info: Print                           | No      | 709 | 21.29   | 554 | 16.64     | 3330 | 3562    | 21.24 | 2847    | 16.98 | 16769     | 4963    | 25.99 | 2505    | 13.12 | 19095     |  |  |
|                                          | Yes     | 18  | 4.96    | 188 | 51.79     | 363  | 9       | 0.9   | 708     | 70.59 | 1003      | 15      | 1.43  | 571     | 54.28 | 1052      |  |  |
|                                          | Total   | 727 | 19.69   | 742 | 20.09     | 3693 | 3571    | 20.09 | 3555    | 20    | 17772     | 4978    | 24.71 | 3076    | 15.27 | 20147     |  |  |
| Modern contraceptive                     | No      | 27  | 14.59   | 65  | 35.14     | 185  | 28      | 4.11  | 372     | 54.63 | 681       | 81      | 7.53  | 417     | 38.75 | 1076      |  |  |
|                                          | Yes     | 34  | 9.26    | 161 | 43.87     | 367  | 124     | 7.46  | 755     | 45.43 | 1662      | 155     | 7.41  | 714     | 34.15 | 2091      |  |  |
|                                          | Total   | 61  | 11.05   | 226 | 40.94     | 552  | 152     | 6.49  | 1127    | 48.1  | 2343      | 236     | 7.45  | 1131    | 35.71 | 3167      |  |  |
| Information on pregnancy<br>complication | No      | 185 | 17.19   | 224 | 20.82     | 1076 | 548     | 13.09 | 767     | 18.33 | 4185      | 931     | 22.81 | 485     | 11.88 | 4081      |  |  |



| Nigeria                                                        |       | 2003    |       |         |       |           | 2008    |       |         |       |           | 2013    |       |         |       |           |
|----------------------------------------------------------------|-------|---------|-------|---------|-------|-----------|---------|-------|---------|-------|-----------|---------|-------|---------|-------|-----------|
|                                                                |       | Poorest | %     | Richest | %     | All women | Poorest | %     | Richest | %     | All women | Poorest | %     | Richest | %     | All women |
| Unmet need for FP                                              | Yes   | 146     | 10.77 | 480     | 35.4  | 1356      | 537     | 8.3   | 2531    | 39.13 | 6468      | 1004    | 10.9  | 2449    | 26.59 | 9211      |
|                                                                | Total | 331     | 13.61 | 704     | 28.95 | 2432      | 1085    | 10.18 | 3298    | 30.96 | 10653     | 1935    | 14.56 | 2934    | 22.07 | 13292     |
|                                                                | No    | 609     | 19.67 | 599     | 19.35 | 3096      | 3306    | 20.98 | 3034    | 19.25 | 15760     | 4609    | 25.65 | 2673    | 14.87 | 17971     |
| Health worker's assistance during pregnancy outside a facility | Yes   | 116     | 19.5  | 144     | 24.2  | 595       | 246     | 12.81 | 517     | 26.93 | 1920      | 349     | 16.37 | 401     | 18.81 | 2132      |
|                                                                | Total | 725     | 19.64 | 743     | 20.13 | 3691      | 3552    | 20.09 | 3551    | 20.08 | 17680     | 4958    | 24.66 | 3074    | 15.29 | 20103     |
|                                                                | No    | 622     | 25.99 | 261     | 10.91 | 2393      | 3324    | 25.97 | 1357    | 10.6  | 12799     | 4490    | 33.36 | 954     | 7.09  | 13461     |
| ANC: nurse assisted                                            | Yes   | 104     | 8.04  | 481     | 37.17 | 1294      | 233     | 4.74  | 2191    | 44.61 | 4912      | 469     | 7.06  | 2127    | 32.04 | 6639      |
|                                                                | Total | 726     | 19.69 | 742     | 20.12 | 3687      | 3557    | 20.08 | 3548    | 20.03 | 17711     | 4959    | 24.67 | 3081    | 15.33 | 20100     |
|                                                                | No    | 622     | 25.99 | 261     | 10.91 | 2393      | 3324    | 25.97 | 1357    | 10.6  | 12799     | 4490    | 33.36 | 954     | 7.09  | 13461     |
| ANC: Govt. hospital                                            | Yes   | 104     | 8.04  | 481     | 37.17 | 1294      | 233     | 4.74  | 2191    | 44.61 | 4912      | 469     | 7.06  | 2127    | 32.04 | 6639      |
|                                                                | Total | 726     | 19.69 | 742     | 20.12 | 3687      | 3557    | 20.08 | 3548    | 20.03 | 17711     | 4959    | 24.67 | 3081    | 15.33 | 20100     |
|                                                                | No    | 91      | 11.82 | 254     | 32.99 | 770       | 256     | 7.84  | 1285    | 39.34 | 3266      | 286     | 9.63  | 1051    | 35.39 | 2970      |
| ANC: Private hospital                                          | Yes   | 245     | 14.64 | 451     | 26.94 | 1674      | 812     | 11.07 | 2013    | 27.44 | 7337      | 1634    | 15.84 | 1886    | 18.28 | 10315     |
|                                                                | Total | 336     | 13.75 | 705     | 28.85 | 2444      | 1068    | 10.07 | 3298    | 31.1  | 10603     | 1920    | 14.45 | 2937    | 22.11 | 13285     |
|                                                                | No    | 273     | 15.4  | 450     | 25.38 | 1773      | 907     | 11.28 | 2082    | 25.89 | 8042      | 1679    | 16.1  | 1847    | 17.71 | 10429     |
| ANC: 1st trimester                                             | Yes   | 63      | 9.39  | 255     | 38    | 671       | 161     | 6.29  | 1216    | 47.48 | 2561      | 241     | 8.44  | 1090    | 38.17 | 2856      |
|                                                                | Total | 336     | 13.75 | 705     | 28.85 | 2444      | 1068    | 10.07 | 3298    | 31.1  | 10603     | 1920    | 14.45 | 2937    | 22.11 | 13285     |
|                                                                | No    | 258     | 14.45 | 519     | 29.06 | 1786      | 776     | 10.04 | 2376    | 30.73 | 7732      | 1396    | 14.38 | 2030    | 20.9  | 9711      |
| ANC: 1st trimester                                             | Yes   | 73      | 11.53 | 181     | 28.59 | 633       | 285     | 10.1  | 935     | 33.13 | 2822      | 547     | 14.78 | 920     | 24.86 | 3700      |
|                                                                | Total | 331     | 13.68 | 700     | 28.94 | 2419      | 1061    | 10.05 | 3311    | 31.37 | 10554     | 1943    | 14.49 | 2950    | 22    | 13411     |

| Nigeria                              |       | 2003    |       |         |       |           | 2008    |       |         |       |           | 2013    |       |         |       |           |
|--------------------------------------|-------|---------|-------|---------|-------|-----------|---------|-------|---------|-------|-----------|---------|-------|---------|-------|-----------|
|                                      |       | Poorest | %     | Richest | %     | All women | Poorest | %     | Richest | %     | All women | Poorest | %     | Richest | %     | All women |
| ANC: +4 tetanus injection            | No    | 464     | 28.34 | 110     | 6.72  | 1637      | 2739    | 32.56 | 455     | 5.41  | 8411      | 3278    | 41.97 | 267     | 3.42  | 7811      |
|                                      | Yes   | 253     | 12.74 | 618     | 31.12 | 1986      | 808     | 8.8   | 3055    | 33.27 | 9182      | 1670    | 13.72 | 2776    | 22.81 | 12168     |
|                                      | Total | 717     | 19.79 | 728     | 20.09 | 3623      | 3547    | 20.16 | 3510    | 19.95 | 17593     | 4948    | 24.77 | 3043    | 15.23 | 19979     |
| ANC: Home                            | No    | 306     | 13.36 | 681     | 29.74 | 2290      | 962     | 9.95  | 3113    | 32.19 | 9670      | 1860    | 14.5  | 2850    | 22.21 | 12830     |
|                                      | Yes   | 30      | 19.48 | 24      | 15.58 | 154       | 106     | 11.36 | 185     | 19.83 | 933       | 60      | 13.19 | 87      | 19.12 | 455       |
|                                      | Total | 336     | 13.75 | 705     | 28.85 | 2444      | 1068    | 10.07 | 3298    | 31.1  | 10603     | 1920    | 14.45 | 2937    | 22.11 | 13285     |
| Home delivery                        | No    | 128     | 9.22  | 521     | 37.51 | 1389      | 299     | 4.87  | 2742    | 44.69 | 6135      | 631     | 8.1   | 2470    | 31.69 | 7794      |
|                                      | Yes   | 600     | 25.96 | 222     | 9.61  | 2311      | 3280    | 28.07 | 823     | 7.04  | 11684     | 4354    | 35.12 | 616     | 4.97  | 12398     |
|                                      | Total | 728     | 19.68 | 743     | 20.08 | 3700      | 3579    | 20.09 | 3565    | 20.01 | 17819     | 4985    | 24.69 | 3086    | 15.28 | 20192     |
| Delivery: government health facility | No    | 658     | 22.5  | 468     | 16.01 | 2924      | 3384    | 23.92 | 2095    | 14.81 | 14149     | 4549    | 30.14 | 1682    | 11.14 | 15092     |
|                                      | Yes   | 70      | 9.02  | 275     | 35.44 | 776       | 195     | 5.31  | 1470    | 40.05 | 3670      | 436     | 8.55  | 1404    | 27.53 | 5100      |
|                                      | Total | 728     | 19.68 | 743     | 20.08 | 3700      | 3579    | 20.09 | 3565    | 20.01 | 17819     | 4985    | 24.69 | 3086    | 15.28 | 20192     |
| Delivery: private health facility    | No    | 671     | 21.67 | 497     | 16.05 | 3097      | 3483    | 22.49 | 2341    | 15.12 | 15484     | 4802    | 27.38 | 2025    | 11.54 | 17541     |
|                                      | Yes   | 57      | 9.45  | 246     | 40.8  | 603       | 96      | 4.11  | 1224    | 52.42 | 2335      | 183     | 6.9   | 1061    | 40.02 | 2651      |
|                                      | Total | 728     | 19.68 | 743     | 20.08 | 3700      | 3579    | 20.09 | 3565    | 20.01 | 17819     | 4985    | 24.69 | 3086    | 15.28 | 20192     |
| Birth assistance: Doctor             | No    | 711     | 20.92 | 590     | 17.36 | 3399      | 3504    | 21.57 | 2632    | 16.2  | 16246     | 4832    | 26.86 | 2161    | 12.01 | 17988     |
|                                      | Yes   | 15      | 5.21  | 152     | 52.78 | 288       | 53      | 3.62  | 916     | 62.53 | 1465      | 127     | 6.01  | 920     | 43.56 | 2112      |
|                                      | Total | 726     | 19.69 | 742     | 20.12 | 3687      | 3557    | 20.08 | 3548    | 20.03 | 17711     | 4959    | 24.67 | 3081    | 15.33 | 20100     |
| Caesarean section                    | No    | 720     | 20.08 | 693     | 19.33 | 3586      | 3563    | 20.38 | 3352    | 19.18 | 17479     | 4948    | 25.29 | 2817    | 14.40 | 19564     |
|                                      | Yes   | 5       | 7.14  | 38      | 54.29 | 70        | 14      | 4.24  | 208     | 63.03 | 330       | 35      | 7.01  | 238     | 47.70 | 499       |

| Nigeria | 2003    |       |         |       |           | 2008    |       |         |       |           | 2013    |       |         |       |           |
|---------|---------|-------|---------|-------|-----------|---------|-------|---------|-------|-----------|---------|-------|---------|-------|-----------|
|         | Poorest | %     | Richest | %     | All women | Poorest | %     | Richest | %     | All women | Poorest | %     | Richest | %     | All women |
| Total   | 725     | 19.83 | 731     | 19.99 | 3656      | 3577    | 20.09 | 3560    | 19.99 | 17809     | 4983    | 24.84 | 3055    | 15.23 | 20063     |

Title of data: C - Concentration Indices with Covariates: Ghana (years 2000, 2005 & 2014) and Nigeria (years 2003, 2008 & 2013)  
Description of data: Concentration Indices with Covariates and F-test result

| Service use / covariate                      | GHANA  |        |        | NIGERIA |        |        |
|----------------------------------------------|--------|--------|--------|---------|--------|--------|
|                                              | 2003   | 2008   | 2014   | 2003    | 2008   | 2013   |
|                                              | CI     | CI     | CI     | CI      | CI     | CI     |
| <b>Family planning info: health facility</b> | -0.01  | -0.04  | -0.04* | 0.14*   | 0.14*  | 0.15*  |
| Age group                                    |        |        |        |         |        |        |
| 15-24                                        | 0*     | 0.05   | -0.02  | 0.14    | 0.18*  | 0.18*  |
| 25-49                                        | -0.01  | -0.06  | -0.05* | 0.13*   | 0.12*  | 0.14*  |
| F-test                                       | 0.09   | 5.58   | 0.84   | 0.23*   | 3.01   | 3.48   |
| Marital status                               | -0.01  | -0.04  | -0.04* | 0.14*   | 0.14*  | 0.15*  |
| never                                        | -0.02  | -0.06  | -0.01  | 0.04    | 0.06   | 0.03   |
| Currently / previously                       | -0.01  | -0.04  | -0.04* | 0.14*   | 0.14*  | 0.16*  |
| F-test                                       | 0.85   | 2.08   | 0.00   | 0.01*   | 1.65   | 1.89   |
| Maternal occupation                          | -0.01  | -0.04  | -0.04* | 0.14*   | 0.14*  | 0.15*  |
| not working                                  | 0.05   | 0      | 0      | 0.2     | 0.18*  | 0.21*  |
| Professional / sales+                        | 0      | -0.04  | -0.07* | 0.14*   | 0.09*  | 0.12*  |
| Agric                                        | -0.01  | -0.05  | 0      | 0.06    | 0.11*  | 0.08   |
| others                                       | -0.02  | 0.02   | -0.01  | 0.13    | 0.16*  | 0.14*  |
| F-test                                       | 0.52   | 0.49   | 2.96   | 0.52*   | 3.42   | 7.75*  |
| Location                                     | -0.01  | -0.04  | -0.04* | 0.14*   | 0.14*  | 0.15*  |
| urban                                        | -0.02  | -0.01  | -0.02  | 0.02    | 0.08*  | 0.05*  |
| rural                                        | -0.02  | -0.01  | -0.01  | 0.15    | 0.16*  | 0.19*  |
| F-test                                       | 1.66   | 0.04   | 0.00   | 4.98*   | 8.42*  | 39.97* |
| Region (Ghana)                               | -0.01  | -0.04  | -0.04* |         |        |        |
| Western                                      | -0.09  | 0.06   | -0.07  |         |        |        |
| Central                                      | 0.05   | 0.1    | -0.04  |         |        |        |
| Greater Accra                                | 0.04   | -0.01  | -0.06  |         |        |        |
| Volta                                        | 0.07   | 0.01   | 0.03   |         |        |        |
| Eastern                                      | -0.05  | -0.15  | -0.03  |         |        |        |
| Ashanti                                      | 0.06   | 0.14*  | 0      |         |        |        |
| Brong Ahafo                                  | 0.01   | -0.03  | 0.01   |         |        |        |
| Northern                                     | 0.06   | -0.15  | -0.01  |         |        |        |
| Upper West                                   | -0.05  | 0.01   | 0.02   |         |        |        |
| Upper East                                   | 0.07   | -0.06  | 0.07   |         |        |        |
| F-test                                       | 1.60   | 2.63*  | 2.25   |         |        |        |
| Region (Nigeria)                             |        |        |        |         |        |        |
| North Central                                |        |        |        | 0.11    | 0.07   | 0.13*  |
| North East                                   |        |        |        | 0.09    | 0.19*  | 0.1    |
| North West                                   |        |        |        | 0.39*   | 0.29*  | 0.24*  |
| South East                                   |        |        |        | -0.05   | 0.02   | 0.03   |
| South South                                  |        |        |        | 0.1     | 0.02   | 0.05   |
| South West                                   |        |        |        | -0.02   | 0.03   | 0      |
| F-test                                       |        |        |        | 3.21*   | 8.64*  | 22.72* |
| <b>Family planning worker visit</b>          | -0.09* | 0      | -0.1   | 0.25*   | 0.39*  | 0.4*   |
| Age group                                    |        |        |        |         |        |        |
| 15-24                                        | 0      | 0.1    | 0      | 0.2     | 0.49*  | 0.43*  |
| 25-49                                        | -0.11* | 0      | -0.1   | 0.25*   | 0.35*  | 0.38*  |
| F-test                                       | 4.5    | 3.8    | 1.9    | 2.5     | 12.88* | 3      |
| Marital status                               | -0.09* | 0      | -0.1   | 0.25*   | 0.39*  | 0.4*   |
| never                                        | -0.1   | 0.1    | 0      | 0       | 0      | 0      |
| Currently / previously                       | -0.09* | 0      | -0.1   | 0.26*   | 0.4*   | 0.41*  |
| F-test                                       | 0.2    | 1.5    | 0.7    | 1.02*   | 16.72* | 17.47* |
| Maternal occupation                          |        |        |        |         |        |        |
| not working                                  | 0.1    | 0.2    | 0      | 0.43*   | 0.51*  | 0.44*  |
| Professional / sales+                        | -0.18* | -0.1   | 0      | 0.27*   | 0.32*  | 0.37*  |
| Agric                                        | -0.1   | -0.14* | 0      | 0.1     | 0.25*  | 0.2*   |
| others                                       | -0.2   | 0.1    | -0.1   | 0.3     | 0.4*   | 0.36*  |
| F-test                                       | 3.3    | 3.3    | 2.5    | 1.85*   | 11.74* | 9.65*  |
| Location                                     |        |        |        |         |        |        |

| Service use / covariate    | GHANA  |        |         | NIGERIA |         |         |
|----------------------------|--------|--------|---------|---------|---------|---------|
|                            | 2003   | 2008   | 2014    | 2003    | 2008    | 2013    |
|                            | CI     | CI     | CI      | CI      | CI      | CI      |
| urban                      | -0.15* | 0      | 0       | 0.18*   | 0.2*    | 0.14*   |
| rural                      | 0      | 0      | 0       | 0.2     | 0.39*   | 0.42*   |
| F-test                     | 7.05*  | 0.5    | 0.9     | 0.87*   | 13.12*  | 75.99*  |
| Region (Ghana)             |        |        |         |         |         |         |
| Western                    | -0.1   | 0.1    | 0       |         |         |         |
| Central                    | 0      | 0      | 0       |         |         |         |
| Greater Accra              | -0.2   | 0      | -0.1    |         |         |         |
| Volta                      | 0      | 0.1    | -0.1    |         |         |         |
| Eastern                    | 0      | -0.1   | 0.1     |         |         |         |
| Ashanti                    | 0.1    | 0.1    | 0.1     |         |         |         |
| Brong Ahafo                | -0.1   | 0.3    | 0.1     |         |         |         |
| Northern                   | 0      | 0      | 0       |         |         |         |
| Upper West                 | -0.2   | 0      | -0.1    |         |         |         |
| Upper East                 | 0      | 0      | 0.1     |         |         |         |
| F-test                     | 1.2    | 1.5    | 1.3     |         |         |         |
| Region (Nigeria)           |        |        |         |         |         |         |
| North Central              |        |        |         | 0.47*   | 0.36*   | 0.33*   |
| North East                 |        |        |         | 0.3     | 0.34*   | 0.3*    |
| North West                 |        |        |         | 0.2     | 0.58*   | 0.37*   |
| South East                 |        |        |         | 0.25*   | 0.21*   | 0.1     |
| South South                |        |        |         | 0.1     | 0       | 0       |
| South West                 |        |        |         | 0       | 0.16*   | 0.08*   |
| F-test                     |        |        |         | 0.84*   | 22.52*  | 11.55*  |
| <b>Family planning: TV</b> | 0.37*  | 0.4*   | 0.28*   | 0.5*    | 0.58*   | 0.56*   |
| Age group                  |        |        |         |         |         |         |
| 15-24                      | 0.3*   | 0.37*  | 0.26*   | 0.44*   | 0.6*    | 0.61*   |
| 25-49                      | 0.39*  | 0.41*  | 0.29*   | 0.51*   | 0.56*   | 0.53*   |
| F-test                     | 10.04* | 1.5    | 0.1     | 2.26*   | 6.6     | 6.4     |
| Marital status             |        |        |         |         |         |         |
| never                      | 0.2*   | 0.22*  | 0.2*    | 0.1     | 0.29*   | 0.31*   |
| Currently / previously     | 0.37*  | 0.42*  | 0.29*   | 0.51*   | 0.59*   | 0.57*   |
| F-test                     | 7.44*  | 14.01* | 9.22*   | 16.05*  | 33.99*  | 19.30*  |
| Maternal occupation        |        |        |         |         |         |         |
| not working                | 0.33*  | 0.4*   | 0.24*   | 0.52*   | 0.64*   | 0.65*   |
| Professional / sales+      | 0.23*  | 0.27*  | 0.15*   | 0.45*   | 0.48*   | 0.5*    |
| Agric                      | 0.32*  | 0.46*  | 0.32*   | 0.51*   | 0.51*   | 0.41*   |
| others                     | 0.27*  | 0.26*  | 0.21*   | 0.42*   | 0.51*   | 0.49*   |
| F-test                     | 3.5    | 7.64*  | 13.31*  | 2.23*   | 20.73*  | 16.58*  |
| Location                   |        |        |         |         |         |         |
| urban                      | 0.17*  | 0.19*  | 0.13*   | 0.29*   | 0.28*   | 0.25*   |
| rural                      | 0.32*  | 0.44*  | 0.35*   | 0.39*   | 0.63*   | 0.63*   |
| F-test                     | 28.75* | 55.64* | 158.19* | 0.95*   | 275.45* | 140.91* |
| Region (Ghana)             |        |        |         |         |         |         |
| Western                    | 0.22*  | 0.48*  | 0.17*   |         |         |         |
| Central                    | 0.18*  | 0.26*  | 0.22*   |         |         |         |
| Greater Accra              | 0.19*  | 0.12*  | 0.05*   |         |         |         |
| Volta                      | 0.42*  | 0.38*  | 0.25*   |         |         |         |
| Eastern                    | 0.23*  | 0.32*  | 0.32*   |         |         |         |
| Ashanti                    | 0.28*  | 0.21*  | 0.17*   |         |         |         |
| Brong Ahafo                | 0.28*  | 0.44*  | 0.4*    |         |         |         |
| Northern                   | 0.5*   | 0.41*  | 0.37*   |         |         |         |
| Upper West                 | 0.54*  | 0.67*  | 0.4*    |         |         |         |
| Upper East                 | 0.4    | 0.55*  | 0.52*   |         |         |         |
| F-test                     | 4.71*  | 6.48*  | 14.63*  |         |         |         |
| Region (Nigeria)           |        |        |         |         |         |         |
| North Central              |        |        |         | 0.6*    | 0.65*   | 0.56*   |
| North East                 |        |        |         | 0.46*   | 0.64*   | 0.69*   |

| Service use / covariate       | GHANA |        |        | NIGERIA |        |        |
|-------------------------------|-------|--------|--------|---------|--------|--------|
|                               | 2003  | 2008   | 2014   | 2003    | 2008   | 2013   |
|                               | CI    | CI     | CI     | CI      | CI     | CI     |
| North West                    |       |        |        | 0.51*   | 0.77*  | 0.76*  |
| South East                    |       |        |        | 0.3*    | 0.33*  | 0.14*  |
| South South                   |       |        |        | 0.29*   | 0.33*  | 0.23*  |
| South West                    |       |        |        | 0.29*   | 0.28*  | 0.21*  |
| F-test                        |       |        |        | 3.84*   | 53.47* | 85.20* |
| <b>Family planning: Print</b> | 0.54* | 0.52*  | 0.42*  | 0.43*   | 0.65*  | 0.64*  |
| Age group                     |       |        |        |         |        |        |
| 15-24                         | 0.5*  | 0.56*  | 0.3    | 0.4*    | 0.63*  | 0.62*  |
| 25-49                         | 0.55* | 0.51*  | 0.44*  | 0.44*   | 0.64*  | 0.62*  |
| F-test                        | 0.1   | 0.4    | 3.6    | 0.25*   | 0      | 0      |
| Marital status                |       |        |        |         |        |        |
| never                         | 0.3   | 0.5    | 0.4    | 0.2     | 0.36*  | 0.3    |
| Currently / previously        | 0.55* | 0.52*  | 0.43*  | 0.45*   | 0.66*  | 0.65*  |
| F-test                        | 2.9   | 0      | 0.6    | 0.79*   | 9.88*  | 8.68*  |
| Maternal occupation           |       |        |        |         |        |        |
| not working                   | 0.45* | 0.46*  | 0.1    | 0.42*   | 0.7*   | 0.73*  |
| Professional / sales+         | 0.4*  | 0.43*  | 0.31*  | 0.4*    | 0.57*  | 0.56*  |
| Agric                         | 0.43* | 0.55*  | 0.3    | 0.5     | 0.42*  | 0.5*   |
| others                        | 0.43* | 0.37*  | 0.2    | 0.38*   | 0.57*  | 0.59*  |
| F-test                        | 0.2   | 0.5    | 0.2    | 1.33*   | 5.55*  | 4.60*  |
| Location                      |       |        |        |         |        |        |
| urban                         | 0.31* | 0.36*  | 0.26*  | 0.34*   | 0.39*  | 0.36*  |
| rural                         | 0.45* | 0.54*  | 0.45*  | 0.3*    | 0.67*  | 0.67*  |
| F-test                        | 2.9   | 2.1    | 4.7    | 0.30*   | 42.82* | 13.89* |
| Region (Ghana)                |       |        |        |         |        |        |
| Western                       | 0.69* | 0.6    | 0.3    |         |        |        |
| Central                       | 0.4   | 0.3    | 0.4    |         |        |        |
| Greater Accra                 | 0.32* | 0.47*  | 0.1    |         |        |        |
| Volta                         | 0.4   | 0.57*  | 0.48*  |         |        |        |
| Eastern                       | 0.5   | 0.4    | 0.3    |         |        |        |
| Ashanti                       | 0.41* | 0.49*  | 0.61*  |         |        |        |
| Brong Ahafo                   | 0.42* | 0.64*  | 0.55*  |         |        |        |
| Northern                      | 0.3   | 0.4    | 0.9    |         |        |        |
| Upper West                    | 0.9   | 0.74*  | 0.5    |         |        |        |
| Upper East                    | 0.2   | 0.72*  | 0.5    |         |        |        |
| F-test                        | 0.4   | 0.8    | 1.7    |         |        |        |
| Region (Nigeria)              |       |        |        |         |        |        |
| North Central                 |       |        |        | 0.57*   | 0.75*  | 0.75*  |
| North East                    |       |        |        | 0.37*   | 0.61*  | 0.71*  |
| North West                    |       |        |        | 0.32*   | 0.77*  | 0.77*  |
| South East                    |       |        |        | 0.38*   | 0.45*  | 0.24*  |
| South South                   |       |        |        | 0.25*   | 0.49*  | 0.35*  |
| South West                    |       |        |        | 0.42*   | 0.41*  | 0.45*  |
| F-test                        |       |        |        | 1.51*   | 12.52* | 19.37* |
| <b>Modern contraceptive</b>   | 0     | -0.1   | -0.06* | 0       | -0.04* | 0      |
| Age group                     |       |        |        |         |        |        |
| 15-24                         | 0     | -0.1   | -0.08* | 0.1     | 0      | 0      |
| 25-49                         | 0     | 0      | -0.05* | 0       | -0.05* | 0      |
| F-test                        | 0     | 0      | 7.25*  | 0.17*   | 5      | 3.2    |
| Marital status                |       |        |        |         |        |        |
| never                         | 0     | -0.2   | -0.1   | 0.1     | 0.1    | 0.07*  |
| Currently / previously        | 0     | 0      | -0.06* | 0       | -0.04* | 0      |
| F-test                        | 5.2   | *      | *      | 0.05*   | 1.6    | 4.6    |
| Maternal occupation           |       |        |        |         |        |        |
| not working                   | 0     | -0.1   | -0.1   | 0.1     | -0.1   | 0      |
| Professional / sales+         | 0     | 0      | -0.08* | 0       | 0      | 0      |
| Agric                         | 0     | -0.07* | 0      | 0       | -0.09* | 0      |

| Service use / covariate                      | GHANA |       |        | NIGERIA |        |       |
|----------------------------------------------|-------|-------|--------|---------|--------|-------|
|                                              | 2003  | 2008  | 2014   | 2003    | 2008   | 2013  |
|                                              | CI    | CI    | CI     | CI      | CI     | CI    |
| others                                       | 0     | 0     | -0.07* | 0       | 0      | -0.1  |
| F-test                                       | 0.3   | 0.6   | 2.8    | 0.59*   | 4.67*  | 3.2   |
| Location                                     |       |       |        |         |        |       |
| urban                                        | 0     | -0.1  | -0.07* | 0       | 0      | 0     |
| rural                                        | 0     | -0.1  | 0      | 0       | -0.04* | 0     |
| F-test                                       | 5.23* | 0.35* | 0.01*  | 0.00*   | 1.9    | 6.69* |
| Region (Ghana)                               |       |       |        |         |        |       |
| Western                                      | 0     | -0.1  | 0      |         |        |       |
| Central                                      | 0.1   | -0.1  | 0      |         |        |       |
| Greater Accra                                | -0.1  | 0     | -0.11* |         |        |       |
| Volta                                        | 0     | 0     | 0      |         |        |       |
| Eastern                                      | 0     | 0.1   | 0      |         |        |       |
| Ashanti                                      | 0     | 0     | -0.09* |         |        |       |
| Brong Ahafo                                  | 0     | 0     | 0      |         |        |       |
| Northern                                     | 0.19* | 0     | 0      |         |        |       |
| Upper West                                   | 0     | 0     | 0      |         |        |       |
| Upper East                                   | 0     | 0     | 0      |         |        |       |
| F-test                                       | 2.1   | 1.2   | 6.69*  |         |        |       |
| Region (Nigeria)                             |       |       |        |         |        |       |
| North Central                                |       |       |        | 0       | 0      | 0     |
| North East                                   |       |       |        | -0.1    | 0      | 0     |
| North West                                   |       |       |        | 0.15*   | 0      | 0.07* |
| South East                                   |       |       |        | 0.23*   | -0.1   | -0.1  |
| South South                                  |       |       |        | 0       | 0      | 0     |
| South West                                   |       |       |        | 0       | 0      | 0     |
| F-test                                       |       |       |        | 10.23*  | 1      | 2.5   |
| <b>Information on pregnancy complication</b> | 0.08* | 0.07* | 0.02*  | 0.13*   | 0.12*  | 0.1*  |
| Age group                                    |       |       |        |         |        |       |
| 15-24                                        | 0.06* | 0.06* | 0      | 0.16*   | 0.12*  | 0.1*  |
| 25-49                                        | 0.09* | 0.07* | 0.02*  | 0.11*   | 0.11*  | 0.09* |
| F-test                                       | 2.8   | 0.4   | 1      | 6.72*   | 0.3    | 0     |
| Marital status                               |       |       |        |         |        |       |
| Never                                        | 0.15* | 0.1   | 0      | 0.1     | 0.1    | 0.08* |
| Currently / previously                       | 0.08* | 0.07* | 0.02*  | 0.13*   | 0.12*  | 0.1*  |
| F-test                                       | 0.2   | 0.3   | 0.9    | 4.09*   | 6      | 0.9   |
| Maternal occupation                          |       |       |        |         |        |       |
| not working                                  | 0.15* | 0     | 0      | 0.17*   | 0.15*  | 0.1*  |
| Professional / sales+                        | 0.06* | 0.04* | 0      | 0.11*   | 0.09*  | 0.09* |
| Agric                                        | 0.1   | 0.06* | 0      | 0.1     | 0      | 0.07* |
| others                                       | 0.1   | 0     | 0.03*  | 0.11*   | 0.11*  | 0.08* |
| F-test                                       | 2.2   | 0.1   | 6.41*  | 0.89*   | 23.48* | 1.8   |
| Location                                     |       |       |        |         |        |       |
| urban                                        | 0     | 0     | 0.02*  | 0.08*   | 0.07*  | 0.05* |
| rural                                        | 0.07* | 0.07* | 0      | 0.09*   | 0.1*   | 0.08* |
| F-test                                       | 6.2   | 8.83* | 1.2    | 1.85*   | 11.85* | 3.3   |
| Region (Ghana)                               |       |       |        |         |        |       |
| Western                                      | 0.12* | 0.09* | 0      |         |        |       |
| Central                                      | 0.1   | 0.1   | 0      |         |        |       |
| Greater Accra                                | 0.08* | 0     | 0      |         |        |       |
| Volta                                        | 0.1   | 0     | 0      |         |        |       |
| Eastern                                      | 0.09* | 0     | 0.1    |         |        |       |
| Ashanti                                      | 0     | 0.07* | 0.1    |         |        |       |
| Brong Ahafo                                  | 0.06* | 0.1*  | 0      |         |        |       |
| Northern                                     | 0     | 0.1   | 0      |         |        |       |
| Upper West                                   | 0.1   | 0.1   | 0.03*  |         |        |       |
| Upper East                                   | 0.1   | 0     | -0.1   |         |        |       |

| Service use / covariate                                  | GHANA  |        |        | NIGERIA |        |        |
|----------------------------------------------------------|--------|--------|--------|---------|--------|--------|
|                                                          | 2003   | 2008   | 2014   | 2003    | 2008   | 2013   |
|                                                          | CI     | CI     | CI     | CI      | CI     | CI     |
| F-test                                                   | 1.7    | 2.48*  | 3.71*  |         |        |        |
| Region (Nigeria)                                         |        |        |        |         |        |        |
| North Central                                            |        |        |        | 0.11*   | 0.2*   | 0.09*  |
| North East                                               |        |        |        | 0.1     | 0.07*  | 0      |
| North West                                               |        |        |        | 0.12*   | 0.09*  | 0.08*  |
| South East                                               |        |        |        | 0.17*   | 0.11*  | 0      |
| South South                                              |        |        |        | 0.16*   | 0.07*  | 0      |
| South West                                               |        |        |        | 0       | 0.03*  | 0.05*  |
| F-test                                                   |        |        |        | 7.17*   | 17.87* | 4.13*  |
| <b>Family planning: unmet need</b>                       | 0      | 0      | 0      | 0.1     | 0.18*  | 0.18*  |
| Age group                                                |        |        |        |         |        |        |
| 15-24                                                    | 0.08*  | 0.1    | 0.1    | 0.1     | 0.25*  | 0.22*  |
| 25-49                                                    | 0      | 0      | 0      | 0       | 0.17*  | 0.17*  |
| F-test                                                   | 11.00* | 5.2    | 4.1    | 1.77*   | 4.6    | 0.5    |
| Marital status                                           |        |        |        |         |        |        |
| never                                                    | 0      | 0.09*  | 0      | 0       | 0      | 0      |
| Currently / previously                                   | 0      | 0      | 0      | 0.1     | 0.19*  | 0.19*  |
| F-test                                                   | 1.6    | 1.2    | 0.5    | 0.08*   | 3.5    | 1.6    |
| Maternal occupation                                      |        |        |        |         |        |        |
| not working                                              | 0.1    | 0      | 0      | 0.1     | 0.21*  | 0.29*  |
| Professional / sales+                                    | 0      | -0.09* | -0.11* | 0.1     | 0.16*  | 0.21*  |
| Agric                                                    | 0.07*  | 0.09*  | 0.1    | 0.1     | 0.12*  | 0      |
| others                                                   | 0      | -0.1   | -0.1   | 0.1     | 0.3*   | 0.19*  |
| F-test                                                   | 6.42*  | 9.19*  | 8.22*  | 0.21*   | 4.41*  | 5.16*  |
| Location                                                 |        |        |        |         |        |        |
| urban                                                    | 0      | -0.1   | -0.11* | 0.1     | 0      | 0      |
| rural                                                    | 0.07*  | 0.07*  | 0.1    | 0       | 0.22*  | 0.21*  |
| F-test                                                   | 24.59* | 25.55* | 31.12* | 0.00*   | 33.55* | 20.63* |
| Region (Ghana)                                           |        |        |        |         |        |        |
| Western                                                  | 0      | -0.1   | -0.17* |         |        |        |
| Central                                                  | -0.1   | -0.1*  | -0.12* |         |        |        |
| Greater Accra                                            | -0.14* | -0.1   | -0.1   |         |        |        |
| Volta                                                    | 0      | -0.1   | -0.1   |         |        |        |
| Eastern                                                  | 0      | 0      | -0.1   |         |        |        |
| Ashanti                                                  | -0.1   | -0.1   | -0.1*  |         |        |        |
| Brong Ahafo                                              | -0.1   | 0      | -0.12* |         |        |        |
| Northern                                                 | 0      | 0      | 0      |         |        |        |
| Upper West                                               | 0      | 0      | 0.1    |         |        |        |
| Upper East                                               | 0      | -0.1   | 0      |         |        |        |
| F-test                                                   | 1.2    | 0.9    | 0.9    |         |        |        |
| Region (Nigeria)                                         |        |        |        |         |        |        |
| North Central                                            |        |        |        | 0       | 0      | -0.1   |
| North East                                               |        |        |        | 0.17*   | 0.1    | 0.1    |
| North West                                               |        |        |        | 0       | 0.21*  | 0.2    |
| South East                                               |        |        |        | 0.22*   | 0.1    | -0.2*  |
| South South                                              |        |        |        | -0.1    | 0      | -0.1   |
| South West                                               |        |        |        | 0       | 0      | 0      |
| F-test                                                   |        |        |        | 2.27*   | 4.22*  | 6.36*  |
| * $p \leq 0.01$                                          |        |        |        |         |        |        |
| +Professional, technical, managerial, Clerical, or sales |        |        |        |         |        |        |



Title of data: D – Concentration Indices with Covariates: Ghana (years 2000, 2005 & 2014) and Nigeria (years 2003, 2008 & 2013)  
 Description of data: Concentration Indices with Covariates and F-test result

| Service use / covariate                                               | GHANA      |            |            | NIGERIA    |            |            |
|-----------------------------------------------------------------------|------------|------------|------------|------------|------------|------------|
|                                                                       | 2003<br>CI | 2008<br>CI | 2014<br>CI | 2003<br>CI | 2008<br>CI | 2013<br>CI |
| <b>Health worker's assistance during pregnancy outside a facility</b> | -0.25*     | -0.21*     | -0.27*     | -0.17*     | -0.21*     | -0.21*     |
| Age group                                                             |            |            |            |            |            |            |
| 15-24                                                                 | -0.23*     | -0.06      | -0.19*     | -0.13*     | -0.14*     | -0.15*     |
| 25-49                                                                 | -0.26*     | -0.25*     | -0.29*     | -0.19*     | -0.23*     | -0.23*     |
| <i>F-test</i>                                                         | 1.23       | 18.51*     | 1.78       | 12.16*     | 128.66*    | 81.64*     |
| Marital status                                                        |            |            |            |            |            |            |
| never                                                                 | -0.21*     | -0.2       | -0.2       | -0.23      | -0.15*     | -0.17*     |
| Currently / previously                                                | -0.25*     | -0.21*     | -0.28*     | -0.17*     | -0.21*     | -0.21*     |
| <i>F-test</i>                                                         | 0.02       | 0.21       | 0.00       | 0.00       | 25.08*     | 1.01       |
| Maternal occupation                                                   |            |            |            |            |            |            |
| not working                                                           | -0.29*     | -0.32*     | -0.2*      | -0.16*     | -0.17*     | -0.17*     |
| Professional / sales+                                                 | -0.35*     | -0.2*      | -0.29*     | -0.19*     | -0.28*     | -0.26*     |
| Agric                                                                 | -0.07*     | -0.03      | -0.08      | -0.14*     | -0.09*     | -0.1*      |
| others                                                                | -0.29*     | -0.24*     | -0.23*     | -0.18*     | -0.23*     | -0.23*     |
| <i>F-test</i>                                                         | 46.17*     | 10.32*     | 4.52*      | 5.17*      | 166.75*    | 71.41*     |
| Location                                                              |            |            |            |            |            |            |
| urban                                                                 | -0.3*      | -0.18*     | -0.19*     | -0.22*     | -0.27*     | -0.24*     |
| rural                                                                 | -0.09*     | -0.07*     | -0.17*     | -0.1*      | -0.13*     | -0.11*     |
| <i>F-test</i>                                                         | 86.48*     | 10.81*     | 0.06       | 29.1*      | 268.66*    | 102.28*    |
| Region (Ghana)                                                        |            |            |            |            |            |            |
| Western                                                               | -0.16*     | -0.29*     | -0.32*     |            |            |            |
| Central                                                               | -0.08      | -0.19*     | 0.05       |            |            |            |
| Greater Accra                                                         | -0.48*     | -0.14      | -0.37*     |            |            |            |
| Volta                                                                 | -0.14*     | -0.02      | -0.07      |            |            |            |
| Eastern                                                               | -0.14*     | -0.15*     | -0.21*     |            |            |            |
| Ashanti                                                               | -0.33*     | -0.33*     | -0.34      |            |            |            |
| Brong Ahafo                                                           | -0.26*     | -0.19*     | -0.08      |            |            |            |
| Northern                                                              | -0.05*     | -0.1       | -0.16*     |            |            |            |
| Upper West                                                            | -0.13*     | -0.15      | -0.31*     |            |            |            |
| Upper East                                                            | -0.12*     | -0.16*     | -0.02      |            |            |            |
| <i>F-test</i>                                                         | 12.3*      | 3.5*       | 4.53*      |            |            |            |
| Region (Nigeria)                                                      |            |            |            |            |            |            |
| North Central                                                         |            |            |            | -0.21*     | -0.15*     | -0.19*     |
| North East                                                            |            |            |            | -0.08*     | -0.08*     | -0.11*     |
| North West                                                            |            |            |            | -0.08*     | -0.06*     | -0.08*     |
| South East                                                            |            |            |            | -0.65*     | -0.27*     | -0.29*     |
| South South                                                           |            |            |            | -0.17*     | -0.21*     | -0.2*      |
| South West                                                            |            |            |            | -0.26*     | -0.24*     | -0.23*     |
| <i>F-test</i>                                                         |            |            |            | 16.92*     | 67.68*     | 37.12*     |
| <b>ANC: nurse assisted</b>                                            | 0.29*      | 0.24*      | 0.11*      | 0.33*      | 0.4*       | 0.39*      |
| Age group                                                             |            |            |            |            |            |            |
| 15-24                                                                 | 0.26*      | 0.19*      | 0.11*      | 0.32*      | 0.4*       | 0.39*      |
| 25-49                                                                 | 0.3*       | 0.25*      | 0.11*      | 0.33*      | 0.39*      | 0.39*      |
| <i>F-test</i>                                                         | 1.81       | 4.75       | 0.5        | 0.91       | 0.33       | 0.94       |
| Marital status                                                        |            |            |            |            |            |            |
| never                                                                 | 0.1        | 0.11*      | 0.09*      | 0.15       | 0.23*      | 0.16*      |
| Currently / previously                                                | 0.29*      | 0.24*      | 0.11*      | 0.34*      | 0.4*       | 0.4*       |
| <i>F-test</i>                                                         | 11.14*     | 8.06*      | 4.96       | 4.84       | 23.14*     | 21.95*     |
| Maternal occupation                                                   |            |            |            |            |            |            |
| not working                                                           | 0.26*      | 0.2*       | 0.08*      | 0.46*      | 0.49*      | 0.47*      |
| Professional / sales+                                                 | 0.16*      | 0.14*      | 0.04*      | 0.3*       | 0.35*      | 0.38*      |
| Agric                                                                 | 0.21*      | 0.26*      | 0.12*      | 0.28*      | 0.26*      | 0.2*       |

| Service use / covariate                | GHANA  |        |        | NIGERIA |         |         |
|----------------------------------------|--------|--------|--------|---------|---------|---------|
|                                        | 2003   | 2008   | 2014   | 2003    | 2008    | 2013    |
|                                        | CI     | CI     | CI     | CI      | CI      | CI      |
| others                                 | 0.21*  | 0.14*  | 0.08*  | 0.29*   | 0.4*    | 0.38*   |
| <i>F-test</i>                          | 2.19   | 7.44*  | 4.33*  | 10.73*  | 42.92*  | 41.97*  |
| Location                               |        |        |        |         |         |         |
| urban                                  | 0.06*  | 0.06*  | 0.02   | 0.16*   | 0.17*   | 0.12*   |
| rural                                  | 0.24*  | 0.24*  | 0.12*  | 0.31*   | 0.41*   | 0.43*   |
| <i>F-test</i>                          | 40.24* | 57.45* | 53.44* | 14.34*  | 267.42* | 380.74* |
| Region (Ghana)                         |        |        |        |         |         |         |
| Western                                | 0.28*  | 0.21*  | 0.08*  |         |         |         |
| Central                                | 0.24*  | 0.26*  | 0.1*   |         |         |         |
| Greater Accra                          | 0.09   | 0.09*  | 0.05   |         |         |         |
| Volta                                  | 0.31*  | 0.22*  | 0.13*  |         |         |         |
| Eastern                                | 0.17*  | 0.18*  | 0.14*  |         |         |         |
| Ashanti                                | 0.17*  | 0.12*  | 0.01   |         |         |         |
| Brong Ahafo                            | 0.23*  | 0.18*  | 0.09*  |         |         |         |
| Northern                               | 0.31*  | 0.33*  | 0.19*  |         |         |         |
| Upper West                             | 0.25*  | 0.27*  | 0.06*  |         |         |         |
| Upper East                             | 0.36*  | 0.25*  | 0.14   |         |         |         |
| <i>F-test</i>                          | 3.67*  | 5.28*  | 6.55*  |         |         |         |
| Region (Nigeria)                       |        |        |        |         |         |         |
| North Central                          |        |        |        | 0.21*   | 0.28*   | 0.27*   |
| North East                             |        |        |        | 0.44*   | 0.53*   | 0.5*    |
| North West                             |        |        |        | 0.55*   | 0.58*   | 0.51*   |
| South East                             |        |        |        | 0.1*    | 0.13*   | 0.09*   |
| South South                            |        |        |        | 0.2*    | 0.2*    | 0.19*   |
| South West                             |        |        |        | 0.05    | 0.1*    | 0.07*   |
| <i>F-test</i>                          |        |        |        | 12.36*  | 83.28*  | 106.45* |
| <b>ANC: government health facility</b> | -0.02* | -0.03* | -0.04* | -0.04   | -0.07*  | -0.07*  |
| Age group                              |        |        |        |         |         |         |
| 15-24                                  | -0.01  | -0.01  | -0.02  | -0.04   | -0.05*  | -0.06*  |
| 25-49                                  | -0.02* | -0.04* | -0.05* | -0.04   | -0.07*  | -0.07*  |
| <i>F-test</i>                          | 2.33   | 5.5    | 2.9    | 0.32    | 2.3     | 1.65    |
| Marital status                         |        |        |        |         |         |         |
| never                                  | -0.08* | 0.02   | 0      | -0.15   | -0.03   | -0.05   |
| Currently / previously                 | -0.02* | -0.03* | -0.04* | -0.04   | -0.07*  | -0.07*  |
| <i>F-test</i>                          | 19.9*  | 1.91   | 0.98   | 4.56    | 3.02    | 2.4     |
| Maternal occupation                    |        |        |        |         |         |         |
| not working                            | -0.01  | -0.04* | -0.03* | -0.02   | -0.08*  | -0.08*  |
| Professional / sales+                  | -0.02  | -0.02  | -0.05* | -0.05*  | -0.08*  | -0.08*  |
| Agric                                  | 0      | -0.01  | 0      | -0.06   | 0       | -0.01   |
| others                                 | -0.03  | -0.05* | -0.02  | -0.07   | -0.1*   | -0.09*  |
| <i>F-test</i>                          | 3.96*  | 4.62*  | 7.99*  | 1.06    | 14.68*  | 8.96*   |
| Location                               |        |        |        |         |         |         |
| urban                                  | -0.03* | -0.01  | -0.04* | -0.03   | -0.1*   | -0.07*  |
| rural                                  | 0      | -0.02* | -0.02* | -0.03   | -0.03*  | -0.03*  |
| <i>F-test</i>                          | 39.48* | 2.62   | 5.66   | 0       | 91.01*  | 23*     |
| Region (Ghana)                         |        |        |        |         |         |         |
| Western                                | -0.02  | -0.01  | -0.02  |         |         |         |
| Central                                | 0.02   | -0.02  | -0.03  |         |         |         |
| Greater Accra                          | -0.03  | -0.01  | -0.07* |         |         |         |
| Volta                                  | -0.01  | -0.03  | 0.02   |         |         |         |
| Eastern                                | 0.01   | 0.02   | -0.02  |         |         |         |
| Ashanti                                | -0.02  | -0.04* | -0.05* |         |         |         |
| Brong Ahafo                            | 0.01   | 0.02   | -0.01  |         |         |         |

| Service use / covariate             | GHANA |       |        | NIGERIA |        |        |
|-------------------------------------|-------|-------|--------|---------|--------|--------|
|                                     | 2003  | 2008  | 2014   | 2003    | 2008   | 2013   |
|                                     | CI    | CI    | CI     | CI      | CI     | CI     |
| Northern                            | -0.01 | -0.02 | 0      |         |        |        |
| Upper West                          | 0.01  | 0     | -0.02  |         |        |        |
| Upper East                          | 0.04  | -0.01 | 0      |         |        |        |
| <i>F-test</i>                       | 2.61* | 4.95* | 8.66*  |         |        |        |
| Region (Nigeria)                    |       |       |        |         |        |        |
| North Central                       |       |       |        | -0.04   | 0.03   | -0.02  |
| North East                          |       |       |        | -0.01   | 0.01   | 0      |
| North West                          |       |       |        | 0.01    | -0.02* | 0      |
| South East                          |       |       |        | -0.12   | -0.05  | -0.11* |
| South South                         |       |       |        | 0.05    | 0.01   | -0.02  |
| South West                          |       |       |        | -0.11*  | -0.08* | -0.08* |
| <i>F-test</i>                       |       |       |        | 4.82*   | 19.02* | 28.48* |
| <b>ANC: Private health facility</b> | 0.24* | 0.3*  | 0.36*  | 0.2*    | 0.23*  | 0.27*  |
| Age group                           |       |       |        |         |        |        |
| 15-24                               | 0.15  | 0.05  | 0.21   | 0.23*   | 0.21*  | 0.27*  |
| 25-49                               | 0.27* | 0.34* | 0.38*  | 0.19*   | 0.23*  | 0.25*  |
| <i>F-test</i>                       | 1.71  | 4.37  | 4.68   | 0.25*   | 0.42   | 0.14   |
| Marital status                      |       |       |        |         |        |        |
| never                               | 0.44* | -0.10 | 0.26   | 0.37*   | 0.17   | 0.17*  |
| Currently / previously              | 0.23* | 0.33* | 0.36*  | 0.19*   | 0.23*  | 0.27*  |
| <i>F-test</i>                       | 1.7   | 4.87  | 0.78   | 1.89*   | 2.34   | 2.68   |
| Maternal occupation                 |       |       |        |         |        |        |
| not working                         | 0.12  | 0.42* | 0.27*  | 0.24*   | 0.35*  | 0.37*  |
| Professional / sales+               | 0.17* | 0.16  | 0.32*  | 0.18*   | 0.23*  | 0.27*  |
| Agric                               | 0.15  | 0.12  | -0.08  | 0.2     | 0.01   | 0.01   |
| others                              | 0.19* | 0.32* | 0.27*  | 0.24*   | 0.26*  | 0.33*  |
| <i>F-test</i>                       | 0.31  | 1.58  | 10.61* | 1.12*   | 50.81* | 26.56* |
| Location                            |       |       |        |         |        |        |
| urban                               | 0.17* | 0.11  | 0.26*  | 0.14*   | 0.21*  | 0.17*  |
| rural                               | 0.09  | 0.32* | 0.26*  | 0.18    | 0.15*  | 0.21*  |
| <i>F-test</i>                       | 1.29  | 7.56* | 0.22   | 0.05*   | 15.45* | 1.69   |
| Region (Ghana)                      |       |       |        |         |        |        |
| Western                             | 0.22  | 0.18  | 0.14   |         |        |        |
| Central                             | -0.07 | 0.22  | 0.36*  |         |        |        |
| Greater Accra                       | 0.12  | 0.27* | 0.28*  |         |        |        |
| Volta                               | 0.3   | 0.27  | -0.16  |         |        |        |
| Eastern                             | 0.12  | 0     | 0.11   |         |        |        |
| Ashanti                             | 0.13  | 0.23* | 0.33*  |         |        |        |
| Brong Ahafo                         | 0.34* | -0.06 | 0.13   |         |        |        |
| Northern                            | 0.31  | 0.44  | 0.15   |         |        |        |
| Upper West                          | -0.16 | -0.43 | 0.48   |         |        |        |
| Upper East                          | -0.19 | 0.56  | 0.71   |         |        |        |
| <i>F-test</i>                       | 1.39  | 1.97  | 0.9    |         |        |        |
| Region (Nigeria)                    |       |       |        |         |        |        |
| North Central                       |       |       |        | 0.11    | 0.01   | 0.09   |
| North East                          |       |       |        | 0.2     | 0.11   | 0.01   |
| North West                          |       |       |        | 0       | 0.3*   | 0.14   |
| South East                          |       |       |        | 0.13*   | 0.12*  | 0.13*  |
| South South                         |       |       |        | 0.21    | 0.27*  | 0.22*  |
| South West                          |       |       |        | 0.13*   | 0.14*  | 0.11*  |
| <i>F-test</i>                       |       |       |        | 4.15*   | 8.98*  | 3.65*  |
| <b>ANC: 1st trimester</b>           | 0.09* | 0.09* | 0.07*  | -0.01   | 0.03   | 0.04   |
| Age group                           |       |       |        |         |        |        |

| Service use / covariate          | GHANA |       |       | NIGERIA |        |        |
|----------------------------------|-------|-------|-------|---------|--------|--------|
|                                  | 2003  | 2008  | 2014  | 2003    | 2008   | 2013   |
|                                  | CI    | CI    | CI    | CI      | CI     | CI     |
| 15-24                            | 0.08* | 0.08  | 0.05  | 0.05    | -0.03  | 0.01   |
| 25-49                            | 0.09* | 0.09* | 0.07* | -0.03   | 0.04*  | 0.04   |
| <i>F-test</i>                    | 0.9   | 0.34  | 2.55  | 3.68*   | 18*    | 6.07   |
| Marital status                   |       |       |       |         |        |        |
| never                            | 0.03  | 0.01  | 0.08* | 0.24    | -0.06  | 0.02   |
| Currently / previously           | 0.09* | 0.1*  | 0.07* | -0.02   | 0.03   | 0.04   |
| <i>F-test</i>                    | 2.02  | 1.95  | 0.15  | 3.23*   | 1.33   | 1.39   |
| Maternal occupation              |       |       |       |         |        |        |
| not working                      | 0.13* | 0.1*  | 0.08* | 0.07    | 0.02   | 0.06   |
| Professional / sales+            | 0.07* | 0.07* | 0.05* | -0.05   | 0.06*  | 0.04   |
| Agric                            | 0.06* | 0.06  | 0.02  | 0       | 0.01   | -0.06  |
| others                           | 0.04  | 0.04  | 0.05* | -0.03   | 0.1*   | 0.11*  |
| <i>F-test</i>                    | 0.9   | 1     | 5.25* | 3.17*   | 3.55*  | 6.45*  |
| Location                         |       |       |       |         |        |        |
| urban                            | 0.06* | 0.08* | 0.07* | 0.07    | 0.1*   | 0.09*  |
| rural                            | 0.06* | 0.08* | 0.07* | -0.06   | 0.01   | 0.04*  |
| <i>F-test</i>                    | 0.96  | 0.25  | 0.13  | 11.63*  | 35.42* | 6.19   |
| Region (Ghana)                   |       |       |       |         |        |        |
| Western                          | 0.11  | 0.07  | 0.04  |         |        |        |
| Central                          | 0.17* | 0.04  | 0.08* |         |        |        |
| Greater Accra                    | 0.08  | 0.08* | 0.08* |         |        |        |
| Volta                            | 0.04  | 0.02  | 0.05  |         |        |        |
| Eastern                          | 0.12  | -0.03 | 0.04  |         |        |        |
| Ashanti                          | 0.09* | 0.09* | 0.07* |         |        |        |
| Brong Ahafo                      | 0.12* | 0.04  | 0.07* |         |        |        |
| Northern                         | 0.13  | 0.18* | 0.04  |         |        |        |
| Upper West                       | -0.05 | 0     | 0.01  |         |        |        |
| Upper East                       | -0.03 | -0.02 | 0.01  |         |        |        |
| <i>F-test</i>                    | 1.53  | 3.1*  | 3.82* |         |        |        |
| Region (Nigeria)                 |       |       |       |         |        |        |
| North Central                    |       |       |       | -0.01   | 0.07*  | -0.01  |
| North East                       |       |       |       | -0.12   | -0.07  | -0.08  |
| North West                       |       |       |       | -0.19*  | -0.21* | -0.16* |
| South East                       |       |       |       | 0.23    | 0.1*   | 0.07*  |
| South South                      |       |       |       | 0.1     | 0.07   | 0.04   |
| South West                       |       |       |       | 0.00    | 0.1*   | 0.07   |
| <i>F-test</i>                    |       |       |       | 6.23*   | 39.75* | 28.43* |
| <b>ANC: +4 tetanus injection</b> | 0.05* | 0.03* | 0.02* | 0.23*   | 0.27*  | 0.22*  |
| Age group                        |       |       |       |         |        |        |
| 15-24                            | 0.05* | 0.04* | 0.02* | 0.24*   | 0.28*  | 0.22*  |
| 25-49                            | 0.05* | 0.03* | 0.02* | 0.23*   | 0.25*  | 0.22*  |
| <i>F-test</i>                    | 0.00  | 1.78  | 0.02  | 0.01*   | 5.75   | 0.00   |
| Marital status                   |       |       |       |         |        |        |
| never                            | 0.01  | 0.07* | 0.02  | 0.08    | 0.1*   | 0.07*  |
| Currently / previously           | 0.05* | 0.03* | 0.02* | 0.24*   | 0.27*  | 0.23*  |
| <i>F-test</i>                    | 7.18* | 1.05  | 0.31  | 9.22*   | 47.96* | 29.26* |
| Maternal occupation              |       |       |       |         |        |        |
| not working                      | 0.04  | 0.06* | 0.01  | 0.33*   | 0.35*  | 0.29*  |
| Professional / sales+            | 0.02* | 0.02* | 0.01  | 0.24*   | 0.23*  | 0.21*  |
| Agric                            | 0.05* | 0.02  | 0.01  | 0.14*   | 0.18*  | 0.1*   |
| others                           | 0.03* | 0.03* | 0.01  | 0.21*   | 0.27*  | 0.19*  |
| <i>F-test</i>                    | 3.9*  | 2.86  | 2.45  | 9.95*   | 79.63* | 86.53* |
| Location                         |       |       |       |         |        |        |
| urban                            | 0.01  | 0.02* | 0.01  | 0.11*   | 0.09*  | 0.06*  |

| Service use / covariate | GHANA  |        |       | NIGERIA |         |         |
|-------------------------|--------|--------|-------|---------|---------|---------|
|                         | 2003   | 2008   | 2014  | 2003    | 2008    | 2013    |
|                         | CI     | CI     | CI    | CI      | CI      | CI      |
| rural                   | 0.03*  | 0.03*  | 0.02* | 0.2*    | 0.28*   | 0.23*   |
| <i>F-test</i>           | 21.76* | 7.75*  | 0.03  | 6.34*   | 437.41* | 300.26* |
| Region (Ghana)          |        |        |       |         |         |         |
| Western                 | 0.01   | 0.03   | 0.02  |         |         |         |
| Central                 | 0.02   | 0.02   | -0.01 |         |         |         |
| Greater Accra           | 0.04*  | 0.05*  | 0.01  |         |         |         |
| Volta                   | 0.08*  | 0.01   | 0.01  |         |         |         |
| Eastern                 | 0.00   | 0.03   | 0.02  |         |         |         |
| Ashanti                 | 0.04*  | 0.02   | 0.01  |         |         |         |
| Brong Ahafo             | 0.04*  | 0.05*  | 0.01  |         |         |         |
| Northern                | 0.05   | 0.05*  | 0.01  |         |         |         |
| Upper West              | 0.03   | 0.00   | 0.01  |         |         |         |
| Upper East              | 0.04   | -0.02  | 0.03  |         |         |         |
| <i>F-test</i>           | 2.66*  | 4.58*  | 2.17  |         |         |         |
| Region (Nigeria)        |        |        |       | 0.23*   | 0.27*   | 0.22*   |
| North Central           |        |        |       | 0.15*   | 0.16*   | 0.14*   |
| North East              |        |        |       | 0.24*   | 0.3*    | 0.2*    |
| North West              |        |        |       | 0.43*   | 0.4*    | 0.29*   |
| South East              |        |        |       | 0.04*   | 0.06*   | 0.02*   |
| South South             |        |        |       | 0.13*   | 0.11*   | 0.07*   |
| South West              |        |        |       | 0.02    | 0.06*   | 0.08*   |
| <i>F-test</i>           |        |        |       | 25.79*  | 205.75* | 121.51* |
| <b>ANC: Home</b>        | -0.26* | -0.25* | -0.1  | -0.23*  | -0.15*  | 0.05    |
| Age group               |        |        |       |         |         |         |
| 15-24                   | -0.07  | -0.23  | 0.15  | -0.23   | -0.08   | 0.21*   |
| 25-49                   | -0.3*  | -0.26  | -0.19 | -0.24*  | -0.17*  | 0.01    |
| <i>F-test</i>           | 0.79   | 0.26   | 0.6   | 0.01*   | 1.56    | 5.74    |
| Marital status          |        |        |       |         |         |         |
| never                   | 0.08   |        | -0.34 | -0.31   | -0.08   | -0.02   |
| Currently / previously  | -0.27* |        | -0.07 | -0.22*  | -0.16*  | 0.06    |
| <i>F-test</i>           | 0.81   |        | 1.37  | 0*      | 1.02    | 0.29    |
| Maternal occupation     |        |        |       |         |         |         |
| not working             | -0.22  |        | 0.21  | -0.33   | -0.22*  | 0.05    |
| Professional / sales+   | -0.27  |        | -0.13 | -0.22   | -0.14*  | 0.09    |
| Agric                   | -0.24  |        | -0.06 | 0.05    | 0.01    | 0.11    |
| others                  | -0.43  |        | -0.53 | -0.24   | -0.07   | 0.13    |
| <i>F-test</i>           | 0.20   |        | 1.24  | 2.17*   | 6.27*   | 0.51    |
| Location                |        |        |       |         |         |         |
| urban                   | -0.41  |        | -0.18 | -0.29*  | -0.13   | -0.02   |
| rural                   | -0.1   |        | 0.03  | -0.12   | -0.09*  | 0.11    |
| <i>F-test</i>           | 2.55   |        | 1.31  | 3.93*   | 0.02    | 3.54    |
| Region (Ghana)          |        |        |       |         |         |         |
| Western                 | -0.29  |        | 0.35  |         |         |         |
| Central                 | -0.74  |        | 0.63  |         |         |         |
| Greater Accra           | -0.86  |        | -0.83 |         |         |         |
| Volta                   | -0.21  |        | -0.27 |         |         |         |
| Eastern                 | -0.02  |        | *     |         |         |         |
| Ashanti                 | 0.06   |        | *     |         |         |         |
| Brong Ahafo             | -0.59* |        | *     |         |         |         |
| Northern                | -0.04  |        | *     |         |         |         |
| Upper West              | -0.23  |        | *     |         |         |         |
| Upper East              | 0.25   |        | *     |         |         |         |
| <i>F-test</i>           | 1.18   |        | *     |         |         |         |
| Region (Nigeria)        |        |        |       |         |         |         |

| Service use / covariate | GHANA |      |      | NIGERIA |        |        |
|-------------------------|-------|------|------|---------|--------|--------|
|                         | 2003  | 2008 | 2014 | 2003    | 2008   | 2013   |
|                         | CI    | CI   | CI   | CI      | CI     | CI     |
| North Central           |       |      |      | 0.08    | -0.22* | 0.04   |
| North East              |       |      |      | 0.03    | -0.31* | -0.41  |
| North West              |       |      |      | -0.48   | -0.08  | -0.14  |
| South East              |       |      |      | -0.54*  | -0.39* | -0.23* |
| South South             |       |      |      | -0.26*  | -0.39* | -0.21* |
| South West              |       |      |      | -0.17   | -0.12  | -0.07  |
| <i>F-test</i>           |       |      |      | 1.93*   | 5.23*  | 1.13   |
| <i>*p ≤ 0.01</i>        |       |      |      |         |        |        |

Title of data: E – Concentration Indices with Covariates: Ghana (years 2000, 2005 & 2014) and Nigeria (years 2003, 2008 & 2013)  
Description of data: Concentration Indices with Covariates and F-test result

| Service use / covariate                     | GHANA      |            |            | NIGERIA    |            |            |
|---------------------------------------------|------------|------------|------------|------------|------------|------------|
|                                             | 2003<br>CI | 2008<br>CI | 2014<br>CI | 2003<br>CI | 2008<br>CI | 2013<br>CI |
| <b>Delivery: home</b>                       | -0.14*     | -0.13*     | -0.1*      | -0.12*     | -0.15*     | -0.14*     |
| Age group                                   |            |            |            |            |            |            |
| 15-24                                       | -0.13*     | -0.09*     | -0.07*     | -0.09*     | -0.12*     | -0.11*     |
| 25-49                                       | -0.15*     | -0.14*     | -0.1*      | -0.12*     | -0.16*     | -0.15*     |
| F-test                                      | 1.78       | 15.83*     | 11.87*     | 11.31*     | 96.56*     | 51.47*     |
| Marital status                              |            |            |            |            |            |            |
| never                                       | -0.1*      | -0.1*      | -0.07*     | -0.09*     | -0.09*     | -0.09*     |
| Currently / previously                      | -0.14*     | -0.13*     | -0.1*      | -0.11*     | -0.15*     | -0.14*     |
| F-test                                      | 0.00       | 0.13       | 2.79       | 0.04*      | 33.77*     | 5.48       |
| Maternal occupation                         |            |            |            |            |            |            |
| not working                                 | -0.14*     | -0.11*     | -0.07*     | -0.11*     | -0.14*     | -0.13*     |
| Professional / sales+                       | -0.12*     | -0.09*     | -0.06*     | -0.13*     | -0.17*     | -0.16*     |
| Agric                                       | -0.06*     | -0.09*     | -0.06*     | -0.08*     | -0.08*     | -0.06*     |
| others                                      | -0.13*     | -0.1*      | -0.08*     | -0.11*     | -0.17*     | -0.15*     |
| F-test                                      | 33.21*     | 3.30       | 3.8*       | 8.45*      | 111.48*    | 70.65*     |
| Location                                    |            |            |            |            |            |            |
| urban                                       | -0.07*     | -0.05*     | -0.04*     | -0.09*     | -0.12*     | -0.09*     |
| rural                                       | -0.07*     | -0.1*      | -0.07*     | -0.08*     | -0.11*     | -0.09*     |
| F-test                                      | 24.9*      | 2.13       | 0.99       | 17.46*     | 44.37*     | 11.49*     |
| Region (Ghana)                              |            |            |            |            |            |            |
| Western                                     | -0.09*     | -0.12*     | -0.08*     |            |            |            |
| Central                                     | -0.09*     | -0.1*      | -0.09*     |            |            |            |
| Greater Accra                               | -0.09*     | -0.05*     | -0.03      |            |            |            |
| Volta                                       | -0.14*     | -0.11*     | -0.09*     |            |            |            |
| Eastern                                     | -0.08*     | -0.08*     | -0.1*      |            |            |            |
| Ashanti                                     | -0.12*     | -0.09*     | -0.05*     |            |            |            |
| Brong Ahafo                                 | -0.12*     | -0.1*      | -0.08*     |            |            |            |
| Northern                                    | -0.06*     | -0.1*      | -0.06      |            |            |            |
| Upper West                                  | -0.08*     | -0.1*      | -0.05*     |            |            |            |
| Upper East                                  | -0.09      | -0.11*     | -0.07      |            |            |            |
| F-test                                      | 4.21*      | 0.69       | 5.54*      |            |            |            |
| Region (Nigeria)                            |            |            |            |            |            |            |
| North Central                               |            |            |            | -0.1*      | -0.11*     | -0.1*      |
| North East                                  |            |            |            | -0.07*     | -0.07*     | -0.08*     |
| North West                                  |            |            |            | -0.06*     | -0.06*     | -0.06*     |
| South East                                  |            |            |            | -0.09*     | -0.1*      | -0.08*     |
| South South                                 |            |            |            | -0.11*     | -0.12*     | -0.1*      |
| South West                                  |            |            |            | -0.06*     | -0.08*     | -0.07*     |
| F-test                                      |            |            |            | 9.06*      | 75.71*     | 18.24*     |
| <b>Delivery: government health facility</b> | 0.10*      | 0.10*      | 0.06*      | 0.05*      | 0.07*      | 0.08*      |
| Age group                                   |            |            |            |            |            |            |
| 15-24                                       | 0.08*      | 0.07*      | 0.06*      | 0.04*      | 0.06*      | 0.07*      |
| 25-49                                       | 0.11*      | 0.11*      | 0.07*      | 0.06*      | 0.08*      | 0.08*      |
| F-test                                      | 4.21       | 7.79*      | 3.76       |            |            |            |
| Marital status                              |            |            |            |            |            |            |
| never                                       | 0.04       | 0.1*       | 0.06*      | 0.01       | 0.03       | 0.03       |
| Currently / previously                      | 0.11*      | 0.1*       | 0.07*      | 0.05*      | 0.07*      | 0.08*      |
| F-test                                      | 7.4*       | 0.24       | 3.46       | 3.79*      | 14.18*     | 1.41       |
| Maternal occupation                         |            |            |            |            |            |            |
| not working                                 | 0.08*      | 0.06*      | 0.04*      | 0.06*      | 0.07*      | 0.08*      |

| Service use / covariate                  | GHANA  |        |        | NIGERIA |         |         |
|------------------------------------------|--------|--------|--------|---------|---------|---------|
|                                          | 2003   | 2008   | 2014   | 2003    | 2008    | 2013    |
|                                          | CI     | CI     | CI     | CI      | CI      | CI      |
| Professional / sales+                    | 0.09*  | 0.07*  | 0.03*  | 0.05*   | 0.08*   | 0.08*   |
| Agric                                    | 0.04*  | 0.07*  | 0.06*  | 0.03    | 0.05*   | 0.04*   |
| others                                   | 0.11*  | 0.07*  | 0.06*  | 0.05*   | 0.07*   | 0.07*   |
| F-test                                   | 12.19* | 0.17   | 2.35   | 1.52*   | 8.06*   | 9.61*   |
| Location                                 | *      | *      | *      |         | *       | *       |
| urban                                    | 0.04*  | 0.03*  | 0.01   | 0.03    | 0.03*   | 0.03*   |
| rural                                    | 0.05*  | 0.08*  | 0.06*  | 0.03*   | 0.06*   | 0.06*   |
| F-test                                   | 0.33   | 12.74* | 4.45   | 3.49*   | 57.12*  | 33.84*  |
| Region (Ghana)                           |        |        |        |         |         |         |
| Western                                  | 0.06   | 0.11*  | 0.07*  |         |         |         |
| Central                                  | 0.05   | 0.09*  | 0.05   |         |         |         |
| Greater Accra                            | 0.07*  | 0.05   | 0.01   |         |         |         |
| Volta                                    | 0.12*  | 0.09*  | 0.08*  |         |         |         |
| Eastern                                  | 0.08*  | 0.09*  | 0.08*  |         |         |         |
| Ashanti                                  | 0.08*  | 0.06*  | 0.00   |         |         |         |
| Brong Ahafo                              | 0.1*   | 0.11*  | 0.08*  |         |         |         |
| Northern                                 | 0.05*  | 0.09*  | 0.06   |         |         |         |
| Upper West                               | 0.07*  | 0.10*  | 0.02   |         |         |         |
| Upper East                               | 0.07   | 0.11*  | 0.07   |         |         |         |
| F-test                                   | 3.59*  | 1.77   | 5.39*  |         |         |         |
| Region (Nigeria)                         |        |        |        |         |         |         |
| North Central                            |        |        |        | 0.04    | 0.08*   | 0.07*   |
| North East                               |        |        |        | 0.06*   | 0.07*   | 0.08*   |
| North West                               |        |        |        | 0.05*   | 0.05*   | 0.06*   |
| South East                               |        |        |        | -0.02   | 0.01    | 0.00    |
| South South                              |        |        |        | 0.06*   | 0.05*   | 0.06*   |
| South West                               |        |        |        | -0.01   | 0.00    | 0.00    |
| F-test                                   |        |        |        | 6.73*   | 53.34*  | 48.29*  |
| <b>Delivery: private health facility</b> | 0.04*  | 0.03*  | 0.03*  | 0.06*   | 0.08*   | 0.07*   |
| Age group                                |        |        |        |         |         |         |
| 15-24                                    | 0.04*  | 0.02   | 0.01   | 0.05*   | 0.05*   | 0.05*   |
| 25-49                                    | 0.04*  | 0.03*  | 0.03*  | 0.07*   | 0.09*   | 0.07*   |
| F-test                                   | 1.38   | 1.84   | 6.56   | 8.42*   | 112.3*  | 74.21*  |
| Marital status                           |        |        |        |         |         |         |
| never                                    | 0.06   | 0.00   | 0.01   | 0.09*   | 0.06*   | 0.05*   |
| Currently / previously                   | 0.04*  | 0.03*  | 0.03*  | 0.06*   | 0.08*   | 0.07*   |
| F-test                                   | 3.67   | 0.83   | 1.39   | 15.92*  | 1.81    | 0.01    |
| Maternal occupation                      |        |        |        |         |         |         |
| not working                              | 0.06*  | 0.06*  | 0.03   | 0.06*   | 0.06*   | 0.05*   |
| Professional / sales+                    | 0.03*  | 0.02   | 0.04*  | 0.07*   | 0.09*   | 0.08*   |
| Agric                                    | 0.01*  | 0.02*  | 0.00   | 0.06*   | 0.03*   | 0.01    |
| others                                   | 0.02*  | 0.02   | 0.02   | 0.06*   | 0.09*   | 0.07*   |
| F-test                                   | 9.29*  | 3.92*  | 18.65* | 1.44*   | 110.13* | 81.13*  |
| Location                                 |        |        |        |         |         |         |
| urban                                    | 0.03   | 0.01   | 0.03*  | 0.06*   | 0.09*   | 0.06*   |
| rural                                    | 0.01*  | 0.02*  | 0.01   | 0.04*   | 0.04*   | 0.03*   |
| F-test                                   | 9.31*  | 0.11   | 45.85* | 42.77*  | 477.31* | 352.89* |
| Region (Ghana)                           |        |        |        |         |         |         |
| Western                                  | 0.03   | 0.02   | 0.00   |         |         |         |
| Central                                  | 0.03   | 0.01   | 0.04   |         |         |         |
| Greater Accra                            | 0.02   | 0.00   | 0.02   |         |         |         |
| Volta                                    | 0.02   | 0.02   | 0.00   |         |         |         |
| Eastern                                  | 0.00   | -0.01  | 0.02   |         |         |         |



| Service use / covariate         | GHANA  |        |        | NIGERIA |         |         |
|---------------------------------|--------|--------|--------|---------|---------|---------|
|                                 | 2003   | 2008   | 2014   | 2003    | 2008    | 2013    |
|                                 | CI     | CI     | CI     | CI      | CI      | CI      |
| Ashanti                         | 0.04*  | 0.03*  | 0.05*  |         |         |         |
| Brong Ahafo                     | 0.02   | -0.01  | 0.01   |         |         |         |
| Northern                        | 0.01   | 0.01   | 0.00   |         |         |         |
| Upper West                      | 0.01   | 0.00   | 0.02   |         |         |         |
| Upper East                      | 0.02   | 0.00   | 0.00   |         |         |         |
| F-test                          | 2.45*  | 1.44   | 5.2*   |         |         |         |
| Region (Nigeria)                |        |        |        |         |         |         |
| North Central                   |        |        |        | 0.06*   | 0.03*   | 0.03*   |
| North East                      |        |        |        | 0.01    | 0.01*   | 0*      |
| North West                      |        |        |        | 0.01    | 0.01*   | 0*      |
| South East                      |        |        |        | 0.12*   | 0.08*   | 0.08*   |
| South South                     |        |        |        | 0.06*   | 0.06*   | 0.05*   |
| South West                      |        |        |        | 0.08*   | 0.08*   | 0.07*   |
| F-test                          |        |        |        | 92.29*  | 205.28* | 269.21* |
| <b>Birth assistance: Doctor</b> | 0.03*  | 0.04*  | 0.05*  | 0.04*   | 0.06*   | 0.05*   |
| Age group                       |        |        |        |         |         |         |
| 15-24                           | 0.03*  | 0.01   | 0.02   | 0.03*   | 0.03*   | 0.03*   |
| 25-49                           | 0.04*  | 0.05*  | 0.06*  | 0.04*   | 0.06*   | 0.06*   |
| F-test                          | 1.92   | 16.94* | 39.72* | 0.13*   | 181.82* | 116.56* |
| Marital status                  |        |        |        |         |         |         |
| never                           | 0.06   | 0.03   | 0.04*  | 0.11*   | 0.03*   | 0.03*   |
| Currently / previously          | 0.03*  | 0.04*  | 0.05*  | 0.03*   | 0.06*   | 0.05*   |
| F-test                          | 1.93   | 0.00   | 1.36   | 28.98*  | 10.47*  | 2.13    |
| Maternal occupation             |        |        |        |         |         |         |
| not working                     | 0.05*  | 0.06*  | 0.03*  | 0.03*   | 0.05*   | 0.04*   |
| Professional / sales+           | 0.04*  | 0.04*  | 0.06*  | 0.05*   | 0.07*   | 0.06*   |
| Agric                           | 0.01*  | 0.01   | 0.01   | 0.04    | 0.01*   | 0.02*   |
| others                          | 0.04*  | 0.04*  | 0.06*  | 0.03*   | 0.06*   | 0.05*   |
| F-test                          | 14.4*  | 8.75*  | 27.89* | 3.08*   | 112.34* | 41.88*  |
| Location                        |        |        |        |         |         |         |
| urban                           | 0.04*  | 0.04*  | 0.05*  | 0.05*   | 0.08*   | 0.07*   |
| rural                           | 0.01   | 0.02*  | 0.03*  | 0.01*   | 0.02*   | 0.02*   |
| F-test                          | 46.54* | 9.84*  | 38.52* | 94.02*  | 870.73* | 423.99* |
| Region (Ghana)                  |        |        |        |         |         |         |
| Western                         | 0.01   | 0.04   | 0.02   |         |         |         |
| Central                         | 0.00   | 0.00   | 0.03*  |         |         |         |
| Greater Accra                   | 0.05*  | 0.04*  | 0.02   |         |         |         |
| Volta                           | 0.03*  | -0.01  | 0.02   |         |         |         |
| Eastern                         | 0.02   | -0.02  | 0.02   |         |         |         |
| Ashanti                         | 0.03*  | 0.05*  | 0.06*  |         |         |         |
| Brong Ahafo                     | 0.01   | 0.03   | 0.02   |         |         |         |
| Northern                        | 0.01   | 0.01   | 0.01   |         |         |         |
| Upper West                      | 0.01   | 0.02   | 0.02   |         |         |         |
| Upper East                      | 0.01   | 0.03   | 0.01   |         |         |         |
| F-test                          | 3.41*  | 4.22*  | 4.29*  |         |         |         |
| Region (Nigeria)                |        |        |        |         |         |         |
| North Central                   |        |        |        | 0.03*   | 0.04*   | 0.03*   |
| North East                      |        |        |        | 0.01*   | 0.01*   | 0.02*   |
| North West                      |        |        |        | 0.00    | 0.02*   | 0.02*   |
| South East                      |        |        |        | 0.07*   | 0.06*   | 0.04*   |
| South South                     |        |        |        | 0.05*   | 0.06*   | 0.06*   |
| South West                      |        |        |        | 0.06*   | 0.09*   | 0.06*   |
| F-test                          |        |        |        | 31.24*  | 161.08* | 80.27*  |

| Service use / covariate | GHANA      |            |            | NIGERIA    |            |            |
|-------------------------|------------|------------|------------|------------|------------|------------|
|                         | 2003<br>CI | 2008<br>CI | 2014<br>CI | 2003<br>CI | 2008<br>CI | 2013<br>CI |
| <b>C Section</b>        | 0.45*      | 0.3*       | 0.31*      | 0.49*      | 0.58*      | 0.49*      |
| Age group               |            |            |            |            |            |            |
| 15-24                   | 0.37       | 0.05       | 0.07       | 0.22       | 0.46*      | 0.33*      |
| 25-49                   | 0.47*      | 0.34*      | 0.32*      | 0.54*      | 0.59*      | 0.52*      |
| F-test                  | 0.1        | 4.51       | 20.73*     | 8.32*      | 3.47       | 9.4*       |
| Marital status          |            |            |            |            |            |            |
| never                   | 0.38       | 0.26       | 0.2        | 0.53       | 0.57*      | 0.27       |
| Currently / previously  | 0.45*      | 0.31*      | 0.32*      | 0.48*      | 0.58*      | 0.5*       |
| F-test                  | 0          | 0.58       | 7.89*      | 0.02       | 0.03       | 1.95       |
| Maternal occupation     |            |            |            |            |            |            |
| not working             | 0.36       | 0.26       | 0.15       | 0.5*       | 0.6*       | 0.59*      |
| Professional / sales+   | 0.45*      | 0.19*      | 0.28*      | 0.44*      | 0.55*      | 0.49*      |
| Agric                   | 0.14       | 0.28       | 0.11       | 0.61       | 0.19       | 0.28       |
| others                  | 0.43       | 0.25       | 0.27*      | 0.45       | 0.46*      | 0.43*      |
| F-test                  | 1.29       | 0.37       | 3.03       | 0.66       | 7.04*      | 1.19       |
| Location                |            |            |            |            |            |            |
| urban                   | 0.36*      | 0.11       | 0.19*      | 0.36*      | 0.41*      | 0.36*      |
| rural                   | 0.14       | 0.38*      | 0.3*       | 0.29       | 0.52*      | 0.37*      |
| F-test                  | 2.32       | 7.19*      | 4.75       | 1.04       | 2.07       | 0.13       |
| Region (Ghana)          |            |            |            |            |            |            |
| Western                 | 0.68       | 0.4        | 0.18*      |            |            |            |
| Central                 | 0.14       | -0.05      | 0.24*      |            |            |            |
| Greater Accra           | 0.22       | 0.16       | 0.17*      |            |            |            |
| Volta                   | 0.57       | 0.19       | 0.15       |            |            |            |
| Eastern                 | 0.43       | -0.09      | 0.16       |            |            |            |
| Ashanti                 | 0.25       | 0.26       | 0.26*      |            |            |            |
| Brong Ahafo             | 0.14       | 0.36       | 0.12       |            |            |            |
| Northern                | 0.37       | 0.49       | 0.36       |            |            |            |
| Upper West              | 0.18       | 0.94       | 0.27       |            |            |            |
| Upper East              | 0.95       | 0.24       | 0.24       |            |            |            |
| F-test                  | 0.92       | 2.25       | 0.66       |            |            |            |
| Region (Nigeria)        |            |            |            |            |            |            |
| North Central           |            |            |            | 0.09       | 0.43*      | 0.5*       |
| North East              |            |            |            | 0.3        | 0.53       | 0.44*      |
| North West              |            |            |            | 0.43       | 0.4        | 0.22       |
| South East              |            |            |            | 0.24*      | 0.45*      | 0.14       |
| South South             |            |            |            | 0.49       | 0.49*      | 0.39*      |
| South West              |            |            |            | 0.6*       | 0.39*      | 0.35*      |
| F-test                  |            |            |            | 0.78       | 0.28       | 1.47       |

\* $p \leq 0.01$
