# Supplementary material for: Examining trends in inequality in the use of reproductive health care services in Ghana and Nigeria
Source: Springer Nature journal article supplement (doi:10.1186/s12884-018-2102-9), 2018-12-01

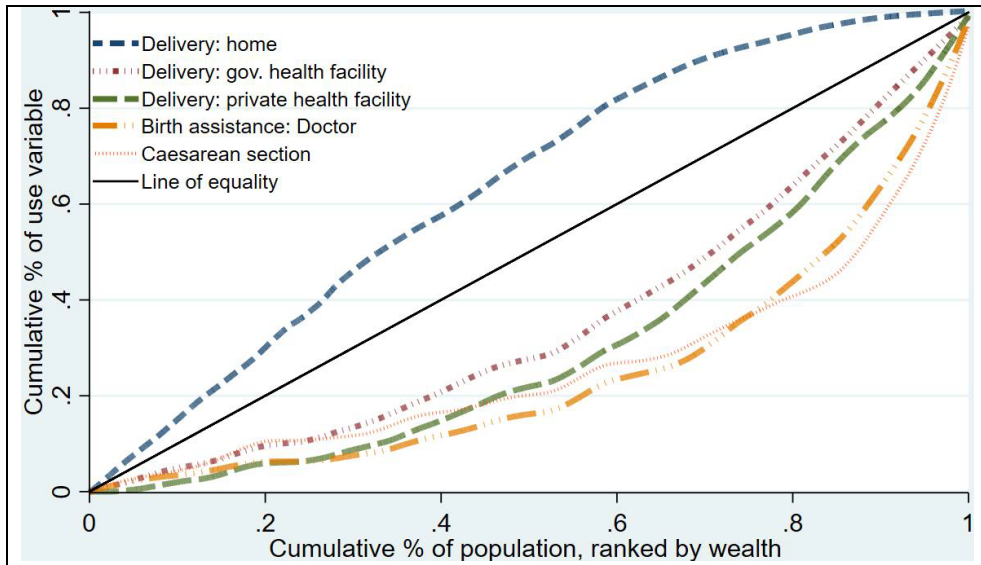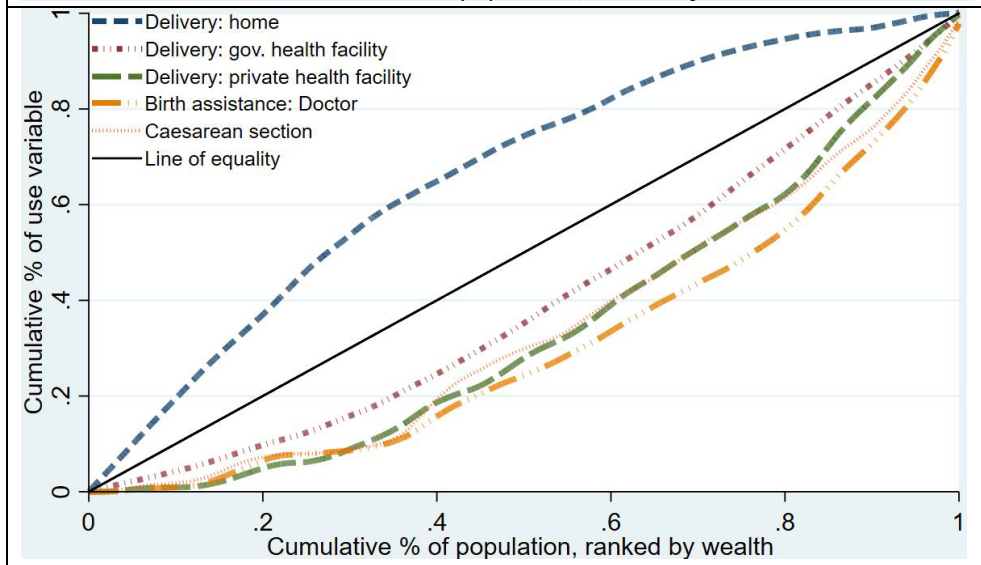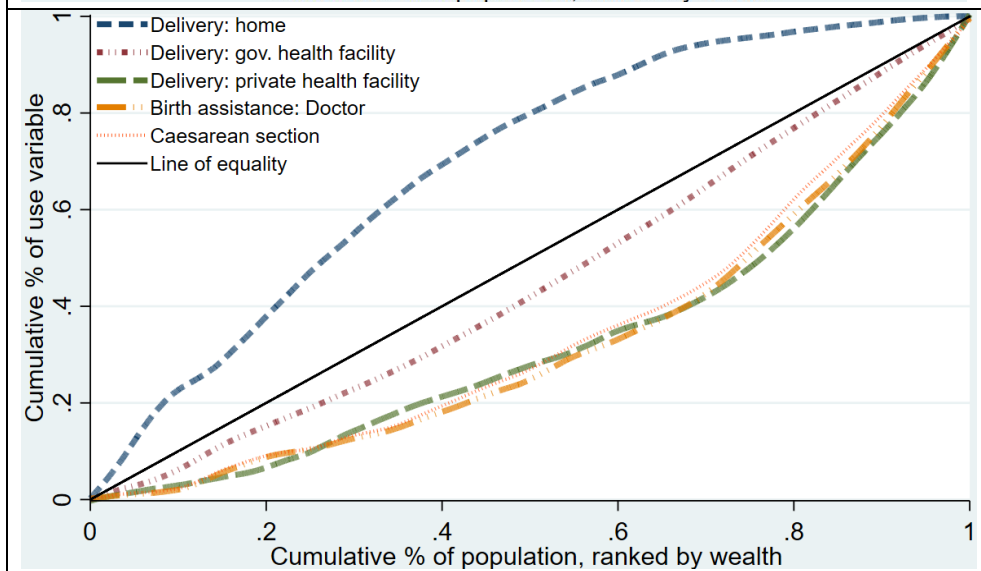

Supplement: MOESM6 [file 16340550]
